# Supplementary material for: Antifungal Compounds from Cyanobacteria
Source: PubMed Central journal article supplement (PMC4413203; doi:10.3390/md13042124), 2015-04-13
Supplement: marinedrugs-13-02124-s001.pdf [file marinedrugs-13-02124-s001.pdf]

# Supplementary Information

## Contents of Tables and Figures

### Tables

**Table S1.** Strains used to screen for antifungal compounds using disc diffusion assay.

**Table S2.**  $^1\text{H}$  and  $^{13}\text{C}$  NMR data for modified 7-OMe-Scytonycin B (**2**, conformers A and B), unknown 7-OMe-Scytonycin B (C) and 7-OMe-Scytonycin B (**1**, conformers D and E) in [D6] DMSO. ( ) = weak signal, [ ] = split signal.

**Table S3.** Scytonycin variants (No and Name), retention times ( $R_t$ ), experimental (Exp) and calculated (Cal) ion masses ( $m/z$ ) of  $[\text{M} + \text{H} - \text{H}_2\text{O}]^+$ ,  $[\text{M} + \text{Na}]^+$  and  $[\text{h} - 4\text{H} + \text{Na}]^+$ , mass error ( $\Delta$ ) in ppm, molecular formula and frequency in strains HAN3/2 = *Scytonema* sp. HAN3/2, HAN11/1 = *Nostoc* sp. HAN11/1, HAN21/1 = *Anabaena* sp. HAN21/1 and PH133 = *Anabaena cf. cylindrica* PH133.

hk = product ion of the sodiated scytonycin, see Figure 2. Accurate mass measurements obtained with Q-TOF and others with ion trap.

**Table S4.** Previously published scytonycin variants, their monoisotopic masses (M), positions of the variable functional groups. 6-OH-7-OMe-scytonycin B = tolytoxin A. Carbon numbers in Figure 1.

**Table S5.** Sodiated ion  $[\text{M} + \text{Na}]^+$  mass ( $m/z$ ), product ions and their  $m/z$ , intensities and comments concerning the tentative structures of scytonycin variants No 1–33. Ion structures a–n are presented in Figure S8.

### Figures

**Figure S1.** Disc diffusion bioassay using cyanobacterial extracts against *Candida albicans* (A) and *Aspergillus flavus* (B). PH133 = *Anabaena cf. cylindrica* PH133; HAN3/2 = *Scytonema* sp. HAN3/2; HAN21/1 = *Anabaena* sp. HAN21/1; HAN11/1 = *Nostoc* sp. HAN11/1; HAN7/1 = *Anabaena* sp. HAN7/1; JV1 = *Anabaena* sp. BIR JV1; 219 = *Nostoc* sp. CENA 219; 6sf = *Nostoc calcicula* 6 sf Calc; 298 = *Fischerella* sp. CENA 298; N107 = *Nostoc* sp. N107.3; 7110 = *Scytonema hofmanni* PCC 7110; – is negative control with methanol and + is 0.1mg of nystatin (Sigma-Aldrich, St. Louis, MO, USA).

**Figure S2.** Nonlabeled ( $^{14}\text{N}$ ) and  $^{15}\text{N}$ -labeled sodiated and dehydrated protonated scytonycin ions from *Anabaena* sp. HAN21/1.

**Figure S3.** NMR spectra of scytonycin preparate containing mainly 7-OMe-scytonycin-B derivative (**2**, Figure 1) and as a minor component native 7-OMe-scytonycin-B (**1**, Figure 1).  $^1\text{H}$  NMR spectrum (A). Annotated  $^1\text{H}$ - $^1\text{H}$  COSY spectra (B and C).  $^1\text{H}$ - $^1\text{H}$  TOCSY spectrum (D). Annotated  $^{13}\text{C}$ -HSQC spectrum (E). Annotated  $^{13}\text{C}$  HMBC spectrum (F, G and H).  $\circ$  = signal intensity too low to be seen in  $^{13}\text{C}$ -HSQC spectrum.

**Figure S4.** Structure of photoreacted 7-OMe-scytonycin B (**2**, Figure 1) with  $^1\text{H}$ - $^1\text{H}$  DQF-COSY (bold lines) and  $^{13}\text{C}$  HMBC (arrows) correlations.

**Figure S5.** Product ion spectrum from sodiated 7-OMe-scytonycin-B ( $m/z$  856.5) produced by *Anabaena* sp. HAN21/1.

**Figure S6.** Product ion spectrum from dehydrated protonated 7-OMe-scytonycin-B from *Anabaena* sp. HAN21/1.

**Figure S7.** Nonlabeled ( $^{14}\text{N}$ ) and  $^{15}\text{N}$ -labeled product ion spectrum from sodiated 7-OMe-scytophycin-B (1, Figure 1 and No 30, Table 2) of *Anabaena* sp. HAN21/1.

**Figure S8.** Structure of scytophycin-B (No 25 in Tables 2, S2 and S4) showing the product ions (a, b, c, dk, ek, fk, gk, hk, ik, jk, lhk, l, mhk, m and n) studied from the sodiated ion  $[\text{M} + \text{Na}]^+$ .

**Figure S9.** Mass spectra of *Nostoc* sp. CENA 219 hassallidins 1, 2, 3, 5 and 7.

**Figure S10.** Mass spectra of *Nostoc* sp. CENA 219 hassallidins 8, 11, 15, 22, 26 and 27.

**Figure S11.** Mass spectra of *Nostoc* sp. CENA 219 hassallidins 10, 17 and 24.

**Figure S12.** Mass spectra of *Nostoc* sp. 6 sf Calc hassallidins 12, 14, 19 and 25.

**Figure S13.** Mass spectra of *Anabaena* sp. HAN7/1 hassallidins 18, 20, 21 and 23.

**Figure S14.** Mass spectra of *Anabaena cylindrica* BIR JV1 hassallidins 4, 6, and 9.

**Figure S15.** Mass spectra of *Anabaena cylindrica* BIR JV1 hassallidins 13, 16, and 21.

**Table S1.** Strains used to screen for antifungal compounds using disc diffusion assay.

| Genera                     | Growth Media # | Strain  | City/State or State          | place of Sampling               | Year of Isolation | Identification Based on 16S rRNA Sequences |
|----------------------------|----------------|---------|------------------------------|---------------------------------|-------------------|--------------------------------------------|
| <i>Strains from Brazil</i> |                |         |                              |                                 |                   |                                            |
| <i>Nostoc</i> sp.*         | AA/Z8x         | CENA219 | Morro Branco/CE              | water accumulated               | 2009              | +                                          |
| <i>Phormidium</i> sp.      | BG50/Z8        | CENA270 | Paulista/PA                  | water in the pond               | 2009              | JQ771627                                   |
| <i>Fischerella</i> sp.*    | ASM            | CENA298 | Paraíba                      | soil                            | 2009              |                                            |
| <i>Cyanospira</i> *        | AA             | CENA215 | Morro Branco/CE              | water accumulated               | 2009              | +                                          |
| <i>Limnothrix</i>          | BG50           | CENA217 | Morro Branco/CE              | water accumulated               | 2009              |                                            |
| <i>Nostoc</i> *            | AA             | CENA221 | Morro Branco/CE              | water accumulated               | 2009              |                                            |
| <i>Synechococcus</i>       | BG50           | CENA222 | Morro Branco/CE              | water accumulated               | 2009              |                                            |
| <i>Aphanocapsa</i>         | BG50           | CENA223 | Morro Branco/CE              | water accumulated               | 2009              |                                            |
| <i>Geitlerinema</i>        | BG50           | CENA224 | Morro Branco/CE              | water accumulated               | 2009              |                                            |
| <i>Nostoc</i> *            | AA             | CENA227 | Açude São Mateus/CE          | water used by population (lake) | 2009              |                                            |
| <i>Geitlerinema</i>        | BG50           | CENA228 | Açude São Mateus/CE          | water used by population (lake) | 2009              |                                            |
| <i>Leptolyngbya</i>        | BG50           | CENA229 | Açude São Mateus/CE          | water used by population (lake) | 2009              |                                            |
| <i>Synechococcus</i>       | BG50           | CENA232 | Açude São Mateus/CE          | water used by population (lake) | 2009              |                                            |
| <i>Synechococcus</i>       | BG50           | CENA233 | Açude São Mateus/CE          | water used by population (lake) | 2009              |                                            |
| <i>Nostoc</i> *            | AA             | CENA234 | Açude São Mateus/CE          | water used by population (lake) | 2009              |                                            |
| <i>Pseudanabaena</i>       | BG50           | CENA235 | Povoado Novo Aurora/CE       | water in the pond               | 2009              |                                            |
| <i>Planktothrix</i>        | BG50           | CENA236 | Povoado Novo Aurora/CE       | water in the pond               | 2009              |                                            |
| <i>Nostoc</i> *            | AA             | CENA237 | Lagoa Povoado Nova Aurora/CE | water pond used by cattle       | 2009              |                                            |
| <i>Nostoc</i> *            | AA             | CENA238 | Lagoa Povoado Nova Aurora/CE | water pond used by cattle       | 2009              |                                            |
| <i>Nostoc</i> *            | AA             | CENA239 | Lagoa Povoado Nova Aurora/CE | water pond used by cattle       | 2009              |                                            |
| <i>Myxosarcina</i>         | BG50           | CENA240 | Cisterna/Canindé/CE          | water in the cistern            | 2009              |                                            |
| <i>Myxosarcina</i>         | BG50           | CENA241 | Cisterna/Canindé/CE          | water in the cistern            | 2009              | +                                          |
| <i>Myxosarcina</i>         | BG50           | CENA242 | Cisterna/Canindé/CE          | water in the cistern            | 2009              |                                            |
| <i>Myxosarcina</i>         | BG50           | CENA244 | Cisterna/Canindé/CE          | water in the cistern            | 2009              |                                            |
| <i>Anabaena</i> *          | BG0            | CENA247 | Rio Camarão/CE               | river water                     | 2009              |                                            |

Table S1. Cont.

|                       |      |         |                    |                   |      |   |
|-----------------------|------|---------|--------------------|-------------------|------|---|
| <i>Synechococcus</i>  | BG50 | CENA249 | Rio Camarão/CE     | river water       | 2009 |   |
| <i>Gloeotrichia</i> * | AA   | CENA250 | Rio Camarão/CE     | river water       | 2009 |   |
| <i>Microchaete</i> *  | BG50 | CENA251 | Rio Camarão/CE     | river water       | 2009 |   |
| <i>Geitlerinema</i>   | BG50 | CENA252 | Sodrelândia/BA     | water in the pond | 2009 |   |
| <i>Synechococcus</i>  | BG50 | CENA253 | Sodrelândia/BA     | water in the pond | 2009 |   |
| <i>Leptolyngbya</i>   | BG50 | CENA254 | Sodrelândia/BA     | water in the pond | 2009 |   |
| <i>Leptolyngbya</i>   | BG50 | CENA256 | Sodrelândia/BA     | water in the pond | 2009 |   |
| <i>Nostoc</i> *       | AA   | CENA257 | Sodrelândia/BA     | water in the pond | 2009 |   |
| <i>Nostoc</i> *       | AA   | CENA258 | Sodrelândia/BA     | water in the pond | 2009 |   |
| <i>Nostoc</i> *       | BG50 | CENA259 | Sodrelândia/BA     | water in the pond | 2009 |   |
| <i>Nostoc</i> *       | AA   | CENA261 | Sodrelândia/BA     | water in the pond | 2009 |   |
| Chroococcales         | BG0  | CENA263 | Baixão dos Bois/BA | water accumulated | 2009 |   |
| <i>Merismopedia</i>   | BG50 | CENA264 | Icó/CE             | water accumulated | 2009 | + |
| <i>Pseudanabaena</i>  | ASM  | CENA266 | Paulista/PA        | water in the pond | 2009 |   |
| <i>Pseudanabaena</i>  | BG50 | CENA267 | Paulista/PA        | water in the pond | 2009 |   |
| <i>Scytonema</i> *    | BG50 | CENA268 | Paulista/PA        | water in the pond | 2009 |   |
| <i>Nostoc</i> *       | ASM  | CENA269 | Paulista/PA        | water in the pond | 2009 |   |
| <i>Nostoc</i> *       | ASM  | CENA271 | Paulista/PA        | water in the pond | 2009 |   |
| <i>Gloeotrichia</i> * | BG50 | CENA272 | Paulista/PA        | water in the pond | 2009 |   |
| <i>Nostoc</i> *       | ASM  | CENA274 | Bahia              | soil              | 2009 |   |
| <i>Nostoc</i> *       | ASM  | CENA275 | Bahia              | soil              | 2009 |   |
| Chroococcales         | AA   | CENA276 | Bahia              | soil              | 2009 |   |
| <i>Nostoc</i> *       | AA   | CENA277 | Bahia              | soil              | 2009 |   |
| <i>Nostoc</i> *       | BG0  | CENA278 | Bahia              | soil              | 2009 |   |
| <i>Lyngbya</i>        | BG50 | CENA281 | Piauí              | soil              | 2009 |   |
| <i>Leptolyngbya</i>   | ASM  | CENA282 | Piauí              | soil              | 2009 |   |

Table S1. Cont.

|                             |      |         |                     |                               |      |   |
|-----------------------------|------|---------|---------------------|-------------------------------|------|---|
| <i>Calothrix</i> *          | ASM  | CENA283 | Piau í              | soil                          | 2009 |   |
| <i>Gloeotrichia</i> *       | ASM  | CENA285 | Piau í              | soil                          | 2009 |   |
| <i>Pseudanabaena</i>        | BG11 | CENA287 | Piau í              | soil                          | 2009 |   |
| <i>Gloeotrichia</i> *       | AA   | CENA288 | Cear á              | soil                          | 2009 |   |
| <i>Stigonema</i> *          | BG50 | CENA291 | Cear á              | soil                          | 2009 |   |
| <i>Leptolyngbya</i>         | BG50 | CENA292 | Cear á              | soil                          | 2009 |   |
| <i>Nostoc</i> *             | BG50 | CENA293 | Cear á              | soil                          | 2009 |   |
| Nostocales *                | ASM  | CENA294 | Cear á              | soil                          | 2009 |   |
| <i>Stigonema</i> *          | BG50 | CENA295 | Cear á              | soil                          | 2009 |   |
| <i>Nostoc</i> *             | ASM  | CENA296 | Cear á              | soil                          | 2009 |   |
| <i>Leptolyngbya</i>         | BG11 | CENA299 | Rio Grande do Norte | soil                          | 2009 |   |
| <b>Strains from Finland</b> |      |         |                     |                               |      |   |
| <i>Unknown</i> *            | Z8x  | HAN3/1  | Kobben, Hanko       | green biofilm in the pond     | 2012 |   |
| <i>Scytonema</i> sp.*       | Z8x  | HAN3/2  | Kobben, Hanko       | green biofilm in the pond     | 2012 |   |
| <i>Unknown</i> *            | Z8x  | HAN6/1  | Kobben, Hanko       | Growth on rock waterline      | 2012 |   |
| <i>Calothrix</i> sp.*       | Z8x  | HAN6/3  | Kobben, Hanko       | Growth on rock waterline      | 2012 | + |
| <i>Calothrix</i> sp. *      | Z8x  | HAN6/4  | Kobben, Hanko       | Growth on rock waterline      | 2012 | + |
| <i>Unknown</i> *            | Z8x  | HAN7/1  | Kobben, Hanko       | small stones in the water     | 2012 |   |
| <i>Calothrix</i> sp. *      | Z8x  | HAN8/2  | Kobben, Hanko       | Growth on rock waterline      | 2012 | + |
| <i>Nostoc</i> sp. *         | Z8x  | HAN10/1 | Kobben, Hanko       | small pond on a rock          | 2012 | + |
| <i>Nostoc</i> sp. *         | Z8x  | HAN11/1 | Kobben, Hanko       | small pond on a rock          | 2012 | + |
| <i>Calothrix</i> sp. *      | Z8x  | HAN12/2 | Kobben, Hanko       | black spots film, benthic     | 2012 | + |
| <i>Anabaena</i> sp. *       | Z8x  | HAN15/2 | Kobben, Hanko       | Gastropod from waterline      | 2012 | + |
| <i>Unknown</i> *            | Z8x  | HAN15/3 | Kobben, Hanko       | Gastropod from waterline      | 2012 |   |
| <i>Calothrix</i> sp. *      | Z8x  | HAN16/2 | Kobben, Hanko       | Waterplant from shallow water | 2012 | + |

Table S1. Cont.

|                          |     |         |                               |                                    |      |   |
|--------------------------|-----|---------|-------------------------------|------------------------------------|------|---|
| <i>Calothrix</i> sp. *   | Z8x | HAN17/1 | Kobben, Hanko                 | Red biofilm                        | 2012 | + |
| <i>Calothrix</i> sp. *   | Z8x | HAN19/2 | Kobben, Hanko                 | black/green biofilm from waterline | 2012 | + |
| <i>Unknown</i> *         | Z8x | HAN19/3 | Kobben, Hanko                 | black/green biofilm from waterline | 2012 |   |
| <i>Unknown</i> *         | Z8x | HAN20/1 | Kobben, Hanko                 | sediments 10 cm under water        | 2012 |   |
| <i>Calothrix</i> sp. *   | Z8x | HAN20/3 | Kobben, Hanko                 | sediments 10 cm under water        | 2012 | + |
| <i>Anabaena</i> sp. *    | Z8x | HAN21/1 | Kobben, Hanko                 | Gastropod 10 cm under water        | 2012 | + |
| <i>Unknown</i> *         | Z8x | HAN21/2 | Kobben, Hanko                 | Gastropod 10 cm under water        | 2012 |   |
| <i>Calothrix</i> sp. *   | Z8x | HAN21/3 | Kobben, Hanko                 | Gastropod 10 cm under water        | 2012 | + |
| <i>Calothrix</i> sp. *   | Z8x | HAN21/4 | Kobben, Hanko                 | Gastropod 10 cm under water        | 2012 | + |
| <i>Calothrix</i> sp. *   | Z8x | HAN21/5 | Kobben, Hanko                 | Gastropod 10 cm under water        | 2012 | + |
| <i>Nostoc</i> sp. *      | Z8x | HAN22   | Kobben, Hanko                 | biofilm growth on rock waterline   | 2012 | + |
| <i>Calothrix</i> sp. *   | Z8x | HAN22/1 | Kobben, Hanko                 | Black biofilm                      | 2012 | + |
| <i>Unknown</i> *         | Z8x | HAN22/2 | Kobben, Hanko                 | Black biofilm                      | 2012 |   |
| <i>Nostoc</i> sp. *      | Z8x | HAN24/1 | Kobben, Hanko                 | epilithic                          | 2012 | + |
| <i>Tolypothrix</i> sp. * | Z8x | HAN25/1 | Kobben, Hanko                 | epilithic                          | 2012 | + |
| <i>Tolypothrix</i> sp. * | Z8x | HAN26/2 | Hanko Casino sea shore, Hanko | Black biofilm                      | 2012 | + |
| <i>Nostoc</i> sp. *      | Z8x | HAN27   | Hanko Casino sea shore, Hanko | small rock pond                    | 2012 | + |
| <i>Unknown</i> *         | Z8x | HAN29/3 | Hanko Casino sea shore, Hanko | green biofilm on the rock          | 2012 |   |
| <i>Calothrix</i> sp. *   | Z8x | HAN30/2 | Hanko Casino sea shore, Hanko | Green biofilm and Gastropod        | 2012 | + |
| <i>Calothrix</i> sp. *   | Z8x | HAN30/3 | Hanko Casino sea shore, Hanko | Green biofilm and Gastropod        | 2012 | + |
| <i>Unknown</i> *         | Z8x | HAN31/a | Hanko                         | biofilm                            | 2012 |   |
| <i>Unknown</i> *         | Z8x | HAN32/2 | Hanko Casino sea shore, Hanko | epilithic                          | 2012 |   |
| <i>Calothrix</i> sp. *   | Z8x | HAN33/1 | Hanko Casino sea shore, Hanko | brown biofilm on the rock          | 2012 | + |
| <i>Calothrix</i> sp. *   | Z8x | HAN33/2 | Hanko Casino sea shore, Hanko | Brown/yellow biofilm               | 2012 | + |
| <i>Calothrix</i> sp. *   | Z8x | HAN36/2 | Hanko Casino sea shore, Hanko | Biofilm                            | 2012 | + |

Table S1. Cont.

|                          |     |           |                                |               |      |   |
|--------------------------|-----|-----------|--------------------------------|---------------|------|---|
| <i>Anabaena</i> sp. *    | Z8x | HAN37/1   | Hanko Casino sea shore, Hanko  | green biofilm | 2012 | + |
| <i>Calothrix</i> sp. *   | Z8x | HAN37/2   | Hanko Casino sea shore, Hanko  | green biofilm | 2012 | + |
| <i>Calothrix</i> sp. *   | Z8x | HAN37/3   | Hanko Casino sea shore, Hanko  | Green biofilm | 2012 | + |
| <i>Calothrix</i> sp. *   | Z8x | HAN38/2   | Hanko Casino sea shore, Hanko  | Red biofilm   | 2012 | + |
| <i>Unknown</i> *         | Z8x | HAN40/1   | Hanko Casino sea shore, Hanko  | epilithic     | 2012 |   |
| <i>Cyanobium</i> sp.     | Z8  | HIID A3A  | Hiidenvesi, Kirkkoj ärvi       | sediment      | 1999 |   |
| <i>Pseudanabaena</i> sp. | Z8  | HIID A13A | Hiidenvesi, Kirkkoj ärvi       | sediment      | 1999 |   |
| <i>Leptolyngbya</i> sp.  | Z8  | HIID A16A | Hiidenvesi, Kirkkoj ärvi       | sediment      | 1999 |   |
| <i>Leptolyngbya</i> sp.  | Z8  | HIID A19B | Hiidenvesi, Kirkkoj ärvi       | sediment      | 1999 |   |
| <i>Leptolyngbya</i> sp.  | Z8  | HIID A25A | Hiidenvesi, Kirkkoj ärvi       | sediment      | 1999 |   |
| <i>Trichormus</i> sp. *  | Z8x | HIID B6A  | Hiidenvesi, Mustionselk ä      | sediment      | 1999 |   |
| <i>Synechocystis</i> sp. | Z8  | HIID B11B | Hiidenvesi, Mustionselk ä      | sediment      | 1999 |   |
| <i>Leptolyngbya</i> sp.  | Z8  | HIID B15A | Hiidenvesi, Mustionselk ä      | sediment      | 1999 |   |
| <i>Pseudanabaena</i> sp. | Z8  | HIID B19  | Hiidenvesi, Mustionselk ä      | sediment      | 1999 |   |
| <i>Phormidium</i> sp.    | Z8  | HIID B22B | Hiidenvesi, Mustionselk ä      | sediment      | 1999 |   |
| <i>Pseudanabaena</i> sp. | Z8  | HIID C15A | Hiidenvesi, Nummelanselk ä     | sediment      | 1999 |   |
| <i>Nostoc</i> sp. *      | Z8x | HIID C18A | Hiidenvesi, Nummelanselk ä     | sediment      | 1999 |   |
| <i>Leptolyngbya</i> sp.  | Z8  | HIID D2A  | Hiidenvesi, Kiihkelyksenselk ä | sediment      | 1999 |   |
| <i>Trichormus</i> sp. *  | Z8x | HIID D3   | Hiidenvesi, Kiihkelyksenselk ä | sediment      | 1999 |   |
| <i>Anabaena</i> sp. *    | Z8x | HIID D7A  | Hiidenvesi, Kiihkelyksenselk ä | sediment      | 1999 |   |
| <i>Nostoc</i> sp. *      | Z8x | XHIID A1  | Hiidenvesi, Kirkkoj ärvi       | sediment      | 1999 |   |
| <i>Nostoc</i> sp. *      | Z8x | XHIID A6  | Hiidenvesi, Mustionselk ä      | sediment      | 1999 |   |
| <i>Anabaena</i> sp. *    | Z8x | XHIID B2A | Hiidenvesi, Mustionselk ä      | sediment      | 1999 | + |
| <i>Anabaena</i> sp. *    | Z8x | XHIID B6  | Hiidenvesi, Mustionselk ä      | sediment      | 1999 | + |
| <i>Nostoc</i> sp. *      | Z8x | XHIID C1  | Hiidenvesi, Nummelanselk ä     | sediment      | 1999 |   |

Table S1. Cont.

|                             |      |            |                               |                                      |      |
|-----------------------------|------|------------|-------------------------------|--------------------------------------|------|
| <i>Nostoc</i> sp. *         | Z8x  | XHIID C2   | Hiidenvesi, Nummelanselkä     | sediment                             | 1999 |
| <i>Nostoc</i> sp. *         | Z8x  | XHIID C3   | Hiidenvesi, Nummelanselkä     | sediment                             | 1999 |
| <i>Nostoc</i> sp. *         | Z8x  | XHIID C4   | Hiidenvesi, Nummelanselkä     | sediment                             | 1999 |
| <i>Nostoc</i> sp. *         | Z8x  | XHIID C5A  | Hiidenvesi, Nummelanselkä     | sediment                             | 1999 |
| <i>Nostoc</i> sp. *         | Z8x  | XHIID C5B  | Hiidenvesi, Nummelanselkä     | sediment                             | 1999 |
| <i>Cylindrospermum</i> sp.* | Z8x  | XHIID C12  | Hiidenvesi, Nummelanselkä     | sediment                             | 1999 |
| <i>Aphanothece</i> sp.      | Z8x  | XHIID D1   | Hiidenvesi, Kiihkelyksenselkä | sediment                             | 1999 |
| <i>Nostoc</i> sp. *         | Z8x  | XHIID D7   | Hiidenvesi, Kiihkelyksenselkä | sediment                             | 1999 |
| <i>Nostoc</i> sp. *         | Z8x  | XHIID D8   | Hiidenvesi, Kiihkelyksenselkä | sediment                             | 1999 |
| <i>Nostoc</i> sp. *         | Z8x  | XHIID D12  | Hiidenvesi, Kiihkelyksenselkä | sediment                             | 1999 |
| <i>Nostoc</i> sp. *         | Z8x  | XHIID D13  | Hiidenvesi, Kiihkelyksenselkä | sediment                             | 1999 |
| <i>Nostoc</i> sp. *         | Z8x  | XHIID D14  | Hiidenvesi, Kiihkelyksenselkä | sediment                             | 1999 |
| <i>Nostoc</i> sp. *         | Z8x  | 116.7.5    |                               | lichen                               |      |
| <i>Nostoc</i> sp. *         | Z8x  | 116.6.23   |                               | lichen                               |      |
| <i>Nostoc</i> sp. *         | Z8x  | N135.9.1   |                               | lichen                               |      |
| <i>Nostoc</i> sp. *         | Z8x  | N990622III |                               | lichen                               |      |
|                             |      | Ilona      |                               |                                      |      |
| <i>Tolypothrix</i> sp. *    | Z8xS | BIR MGR4   | The Gulf of Finland           |                                      |      |
| <i>Nostoc</i> sp. *         | Z8x  | N122.4.B   |                               | lichen                               |      |
| <i>Nostoc</i> sp. *         | Z8x  | N124.3.B   |                               | lichen                               |      |
| <i>Nostoc</i> sp. *         | Z8x  | N122.4B    |                               | lichen                               |      |
| <i>Nostoc</i> sp. *         | Z8x  | UK4        | Itä-Pakila, Helsinki, Finland | lichen <i>Peltigera spuria</i>       |      |
| <i>Nostoc</i> sp. *         | Z8x  | UK18AIII   | Autti, Finland                | lichen <i>Peltigera leucophlebia</i> |      |
| <i>Nostoc</i> sp. *         | Z8x  | N115.3.2   |                               | lichen                               |      |
| <i>Nostoc</i> sp. *         | Z8x  | UK1        | Oulunkylä Helsinki, Finland   | lichen <i>Peltigera</i> sp.          |      |



Table S1. Cont.

|                              |      |            |                                 |                                      |      |          |
|------------------------------|------|------------|---------------------------------|--------------------------------------|------|----------|
| <i>Nostoc</i> sp. *          | Z8x  | N990653.17 |                                 | lichen                               |      |          |
| <i>Nostoc</i> sp. *          | Z8x  | 102I       |                                 | lichen                               |      |          |
| <i>Nostoc</i> sp. *          | Z8x  | N123.4     |                                 | lichen                               |      |          |
| <i>Nostoc</i> sp. *          | Z8x  | N107.3     |                                 | lichen                               |      |          |
| <i>Nostoc</i> sp. *          | Z8xS | BIR L1S7   | The Gulf of Finland             |                                      |      |          |
| <i>Anabaena cylindrica</i> * | Z8x  | BIR JV1    | The Gulf of Finland             |                                      |      | +        |
| <i>Calothrix</i> sp. *       | Z8x  | UHCC 0022  |                                 |                                      |      |          |
| <i>Nostoc</i> sp. *          | Z8x  | N138       |                                 | lichen                               |      |          |
| <i>Nostoc</i> sp. *          | Z8x  | UK7BIIIm   | It äPakila, Helsinki, Finland   | Lichen <i>Peltigera canina</i> ?     |      |          |
| <i>Nostoc</i> sp. *          | Z8x  | UK35       |                                 | lichen                               |      |          |
| <i>Nostoc</i> sp. *          | Z8x  | UK18AIV    | Autti, Finland                  | Lichen <i>Peltigera leucophlebia</i> |      |          |
| <i>Nostoc</i> sp. *          | Z8x  | UK18AI     | Autti, Finland                  | Lichen <i>Peltigera leucophlebia</i> | 2006 | +        |
| <i>Nostoc</i> sp. *          | Z8x  | UK18BI     | Autti, Finland                  | Lichen <i>Peltigera leucophlebia</i> |      |          |
| <i>Nostoc</i> sp. *          | Z8x  | UK18BIV    | Autti, Finland                  | Lichen <i>Peltigera leucophlebia</i> |      |          |
| <i>Nostoc</i> sp. *          | Z8x  | UK18BIII   | Autti, Finland                  | Lichen <i>Peltigera leucophlebia</i> |      |          |
| <i>Nostoc</i> sp. *          | Z8x  | UK2aImI    | Oulunkyl ä Helsinki, Finland    | Lichen <i>Peltigera praetextata</i>  |      | +        |
| <i>Nostoc</i> sp. *          | Z8x  | UK18BII    | Autti, Finland                  | Lichen <i>Peltigera leucophlebia</i> |      |          |
| <i>Nostoc</i> sp. *          | Z8x  | XPORK5A    | Porkkala cape                   | epiphytic                            | 1999 | +        |
| <i>Anabaena</i> sp. *        | Z8x  | XPORK6B    | Porkkala cape                   | sediment                             |      |          |
| <i>Tolypothrix</i> sp. *     | Z8x  | XPORK34B   | Porkkala cape                   |                                      |      |          |
| <i>Nostoc</i> sp. *          | Z8x  | Nostoc 152 | Lake S ääksj ärvi, Finland      |                                      |      | AJ133161 |
| <i>Calothrix</i> sp. *       | Z8x  | Cal 336/2  | Vihti, En äj ärvi Laukilanlahti |                                      |      |          |
| <i>Nostoc</i> sp. *          | Z8x  | N159       | Lake Haukkaj ärvi, Finland      |                                      |      |          |
| <i>Tolypothrix</i> sp. *     | Z8x  | Tol 328    | Kuopio, Finland                 | greenhouse soil                      | 1999 |          |
| <i>Calothrix</i> sp. *       | Z8x  | Cal 336/3  | Lake En äj ärvi, Finland        | Lake water                           | 1999 |          |

Table S1. Cont.

| <i>Other strains</i>                    |     |           |                                                     |                                                |         |           |
|-----------------------------------------|-----|-----------|-----------------------------------------------------|------------------------------------------------|---------|-----------|
| <i>Anabaena cf.</i>                     | Z8x | PH133     | Lake Arres ø DK                                     |                                                | 1993    | AJ293110  |
| <i>Cylindrica</i> *                     |     |           |                                                     |                                                |         |           |
| <i>Scytonema sp.</i> *                  | Z8x | PCC7110   | Bermuda                                             | Limestone                                      | 1971    |           |
| <i>Tolypothrix sp.</i> *                | Z8x | PCC7415   | Stockholm, Sweden                                   | greenhouse soil                                | 1972    |           |
| <i>Calothrix sp.</i> *                  | Z8x | PCC7103   | United States                                       | Herbarium specimen of <i>Anacystis montana</i> |         |           |
| <i>Calothrix sp.</i> *                  | Z8x | PCC7102   | Antofagasta, Chile                                  | sand                                           | 1958    |           |
| <i>Tolypothrix sp.</i> *                | Z8x | PCC7101   | Borneo                                              | soil                                           | 1950    |           |
| <i>Tolypothrix sp.</i> *                | Z8x | PCC7504   | Stockholm, Sweden                                   | aquarium                                       | 1972    |           |
| <i>Anabaena cylindrica</i> *            | Z8x | PCC7122   | Cambridge, UK                                       | water, most likely pond                        | 1939    | AF091150  |
| <i>Anabaena sp.</i> *                   | Z8x | PCC7108   | Moss Beach, California USA                          | intertidal zone                                | 1970    | AJ133162  |
| <i>Anabaena variabilis</i> *            | Z8x | ATCC29413 | Mississippi, USA                                    | Freshwater                                     | 1964    | NR_074300 |
| <i>Calothrix sp.</i> *                  | Z8x | PCC7103   | unknown                                             | herbarium specimen of <i>Anacystis montana</i> |         | AM230700  |
| <i>Calothrix sp.</i> *                  | Z8x | PCC7507   | near Kastanienbaum, Vierwaldst ätersee, Switzerland | sphagnum bog                                   | 1972    | NR_102891 |
| <i>Cylindrospermopsis raciborskii</i> * | Z8  | CS-505    | Queensland, Australia                               | waterbodies Solomon Dam                        | 1996    | EU552055  |
| <i>Cylindrospermum stagnale</i> *       | Z8x | PCC7417   | Stockholm, Sweden                                   | soil, greenhouse                               | 1972    | NR_114701 |
| <i>Nostoc punctiforme</i> *             | Z8x | PCC73102  | Australia                                           | root section, <i>Macrozamia sp.</i>            | 1973    | AF027655  |
| <i>Nostoc sp.</i> *                     | Z8x | PCC7120   | unknown                                             | unknown                                        | unknown | NR_074310 |
| <i>Fischerella sp.</i> *                | Z8x | PCC9339   | unknown                                             | unknown                                        | unknown | AB075984  |
| <i>Anabaena sp.</i> *                   | Z8x | 6 sf Calc | Dobre Pole                                          | unknown                                        | 1998    |           |

# Culture medium containing nitrogen: Z8, BG50, BG11, AA, ASM; Culture medium without nitrogen: Z8x, Z8xS (Z8 without nitrogen plus salt), BG0. \* Nostocales or Stigonematales Order which are able to produce heterocyst. + Cyanobacterial strains classified based on 16S rRNA sequences not available in the NCBI database.

**Table S2.**  $^1\text{H}$  and  $^{13}\text{C}$  NMR data for modified 7-OMe-Scytophycin B (**2**, conformers A and B), unknown 7-OMe-Scytophycin B (C) and 7-OMe-Scytophycin B (**1**, conformers D and E) in  $[\text{D}_6]$  DMSO. ( ) = weak signal, [ ] = split signal.

| No                  | $\delta_{\text{C}}$ | $\delta_{\text{H}}$ | mult., $J$ (Hz) | COSY                         | HMBC (H→C)                                                  |
|---------------------|---------------------|---------------------|-----------------|------------------------------|-------------------------------------------------------------|
| 1                   | 165.3               | -                   |                 | -                            |                                                             |
| 2                   | 116.8               | 5.68                | d 15.8          | 3                            | 1, [2], 3, 4, 5                                             |
| 3                   | 147.4               | 7.31                | d 15.8          | 2                            | 1, 2, [3], 4, 4-CH <sub>3</sub> , 5                         |
| 4                   | 133.9               | -                   |                 | -                            |                                                             |
| 4-CH <sub>3</sub>   | 11.7                | 1.75                | s               | -                            | 3, 4, [4-CH <sub>3</sub> ], 5, 6                            |
| 5                   | 136.3               | 5.80                |                 | 6, 6'                        | 3, 4, 4-CH <sub>3</sub> , 6, 7                              |
| 6                   | 31.9                | 2.17                |                 | 5, 6'                        | (3), 4, 5, 7, 8                                             |
| 6'                  |                     | 2.69                |                 | 5, 6                         | (4, 5, 7, 8)                                                |
| 7                   | 77.6                | 3.45                |                 | 6, 6', 8, 8'                 | 7-OCH <sub>3</sub> , (5, 8, 9)                              |
| 7-OCH <sub>3</sub>  | 55.8                | 3.32                | s               | -                            | 7, [7-OCH <sub>3</sub> ]                                    |
| 8                   | 38.3                | 1.31                |                 | 7, 8', 9                     | 6, 7, (9), 10                                               |
| 8'                  |                     | 1.59                |                 | (7), 8, 9                    | 6, 7-OCH <sub>3</sub> , 9, 10                               |
| 9                   | 69.6                | 4.30                |                 | 8, 8', 10, 11                | (8), 10, 11, (13)                                           |
| 10                  | 129.9               | 5.63                |                 | 9, 11, 12'                   | 9, [10], 11, 12                                             |
| 11                  | 124.0               | 5.77                |                 | 9, 11, 12                    | 9, 10, [11], 12, 13                                         |
| 12                  | 30.3                | 1.84                |                 | 11, 13                       | 10, 11, 13                                                  |
| 12'                 |                     | 1.87                |                 | 10, 13                       | 10, 11, 13                                                  |
| 13                  | 65.3                | 3.31                |                 | 12', 14'                     | 9, 11, (14), 15                                             |
| 14                  | 34.8                | 1.42                |                 | 14', 15                      | 12, 13, 15, 16                                              |
| 14'                 |                     | 1.50                |                 | 13, 14, 15                   | 12, 13, 15, 16                                              |
| 15                  | 77.7                | 3.67                | dd 4.4, 6.2     | 14, 14'                      | 13, 14, 15-OCH <sub>3</sub> , 16, 16-CH <sub>2</sub> , 17   |
| 15-OCH <sub>3</sub> | 56.8                | 3.31                | s               | -                            | 15, [15-OCH <sub>3</sub> ]                                  |
| 16                  | 60.1                | -                   |                 | -                            |                                                             |
| 16-CH <sub>2</sub>  | 45.0                | 2.56                |                 | 16'-CH <sub>2</sub>          | 15, 16, [16-CH <sub>2</sub> ], 17                           |
| 16'-CH <sub>2</sub> |                     | 2.65                |                 | 16-CH <sub>2</sub>           | 15, 16, [16-CH <sub>2</sub> ], 17                           |
| 17                  | 75.1                | 3.53                |                 | 18, 18'                      | 15, 16, 16-CH <sub>2</sub> , 17-OCH <sub>3</sub> , 18, 19   |
| 17-OCH <sub>3</sub> | 53.4                | 3.14                | s               | -                            | 17, [17-OCH <sub>3</sub> ]                                  |
| 18                  | 28.2                | 1.37                |                 | 17, 18', 19                  | 16, 17, 19, 20                                              |
| 18'                 |                     | 1.73                |                 | 17, 18, 19                   | 16, 17, 19, 20                                              |
| 19                  | 75.8                | 3.07                |                 | 18, 18'                      | (17), 18, 19-OCH <sub>3</sub> , 20, 20-CH <sub>3</sub> , 21 |
| 19-OCH <sub>3</sub> | 56.6                | 3.10                | s               | -                            | 19, [19-OCH <sub>3</sub> ]                                  |
| 20                  | 37.8                | 1.87                |                 | 21, 20-CH <sub>3</sub>       | (18), 20-CH <sub>3</sub> , 21                               |
| 20-CH <sub>3</sub>  | 9.2                 | 0.79                |                 | 20                           | 19, 20, [20-CH <sub>3</sub> ], 21                           |
| 21A                 | 71.9                | 5.28                |                 | 20                           | 1, 19, 20, 20-CH <sub>3</sub>                               |
| 21B                 | 72.1                | 5.07                | 9.5, 19.1       | 20, 22                       | 1, 19, 20, 22, 22-CH <sub>3</sub> , 23                      |
| 22                  | 34.3                | 2.03                |                 | 21B, 22-CH <sub>3</sub> , 23 | 20, 22-CH <sub>3</sub> , 23                                 |
| 22-CH <sub>3</sub>  | 11.3                | 0.99                |                 | 22                           | 21, 22, [24-CH <sub>3</sub> ], 23                           |
| 23                  | 79.2                | 2.97                |                 | 22, 24                       | 21, 22, 22-CH <sub>3</sub> , 24, 24-CH <sub>3</sub> , 27    |
| 24                  | 30.3                | 1.87                |                 | 24-CH <sub>3</sub>           | 24-CH <sub>3</sub> , 25                                     |
| 24-CH <sub>3</sub>  | 17.3                | 0.76                |                 | 24                           | 23, 24, [24-CH <sub>3</sub> ]                               |
| 25                  | 30.3                | 1.60                |                 |                              | 23, 24, 24-CH <sub>3</sub> , 26, 27ABC                      |
| 26                  | 27.8                | 1.27                |                 |                              | 25, 27                                                      |

Table S2. Cont.

|                       |       |            |        |                                |                                                                                    |
|-----------------------|-------|------------|--------|--------------------------------|------------------------------------------------------------------------------------|
| 26'                   |       | 1.49       |        |                                | 27, 28, 31AB                                                                       |
| 27A                   | 84.5  | -          |        |                                |                                                                                    |
| 27B                   | 84.3  | -          |        |                                |                                                                                    |
| 27C                   | 84.0  | -          |        |                                |                                                                                    |
| 27D,E                 | 213.4 | -          |        |                                |                                                                                    |
| 28A                   | 48.0  | 1.62       |        | 29A, 28-CH <sub>3</sub> A      | 26, 27A, 28-CH <sub>3</sub> A, 29A                                                 |
| 28B                   | 48.0  | 1.68       |        | 29B, 28-CH <sub>3</sub> B      | 26, 27B, 28-CH <sub>3</sub> B, 29B, (30B)                                          |
| 28CDE                 | 48.0  | 1.68       |        |                                |                                                                                    |
| 28-CH <sub>3</sub> A  | 7.8   | 0.76       |        | 28A                            | 27A, 28A, [28-CH <sub>3</sub> A], 29A                                              |
| 28-CH <sub>3</sub> B  | 7.8   | 0.77       |        | 28B                            | 27B, 28B, [28-CH <sub>3</sub> B], 29B                                              |
| 28-CH <sub>3</sub> DE | 12.9  | 0.86       |        |                                | [28DE], 29DE                                                                       |
| 29A                   | 86.0  | 3.35       |        | 28A, 30A                       | 27A,B; (28, 28-CH <sub>3</sub> ), 29-OCH <sub>3</sub> , 30-CH <sub>3</sub> , 31A,B |
| 29B                   | 86.1  | 3.33       |        | 28B, 30B                       | 27B, (28, 28-CH <sub>3</sub> ), 29-OCH <sub>3</sub> , 30-CH <sub>3</sub> , 31B     |
| 29C                   | 84.0  | 3.31       |        |                                | 27C, 30-CH <sub>3</sub> C, 31C                                                     |
| 29D,E                 | 85.7  | 3.03       |        |                                | 30-CH <sub>3</sub> DE, 31D                                                         |
| 29-OCH <sub>3</sub>   | 59.7  | 3.15       | s      | -                              | 29, [29-CH <sub>3</sub> ]                                                          |
| 30A                   | 35.6  | 2.46       |        | 29A, 30-CH <sub>3</sub> A, 31A | 31A, 30-CH <sub>3</sub> A, 32A                                                     |
| 30B                   | 36.2  | 2.40       |        | 29B, 30-CH <sub>3</sub> B, 31B | 27B, (28B), 29B, 31B, 30-CH <sub>3</sub> , 32B                                     |
| 30D                   | 36.3  | 2.40       |        |                                | (31D)                                                                              |
| 30E                   | 36.5  | 2.40       |        |                                | (31E)                                                                              |
| 30-CH <sub>3</sub> A  | 15.8  | 0.97       |        | 30A                            | 29AB, 30AB, [30-CH <sub>3</sub> AB], 31AB                                          |
| 30-CH <sub>3</sub> B  | 15.8  | 0.96       |        | 30B                            | 29AB, 30AB, [30-CH <sub>3</sub> AB], 31AB                                          |
| 30-CH <sub>3</sub> C  | 15.0  | 0.90       |        |                                | 27C, 29C, [30-CH <sub>3</sub> C], 31C                                              |
| 30-CH <sub>3</sub> DE | 19.4  | 1.06       |        |                                | 29DE, 30DE, [30-CH <sub>3</sub> DE], 31DE                                          |
| 31A                   | 52.9  | 2.01       |        | 30A, 32A                       | 27A, 28, 29A, 30A, 32A                                                             |
| 31B                   | 52.9  | 2.04       |        | 30B, 32B                       | 27B, 28, (28-CH <sub>3</sub> ), 29B, 30B, 30-CH <sub>3</sub> , 32B                 |
| 31C                   | 52.1  | 2.17       |        | 32C                            | 27C, 28, 29C, 30-CH <sub>3</sub> C, 32C, 33-NCH <sub>3</sub> C                     |
| 31D                   | 110.6 | 4.97, 5.00 |        | 32D, 2.37                      | 30-CH <sub>3</sub> D,E , 32D                                                       |
| 31E                   | 112.7 | 5.07, 5.10 |        | 32E, 2.4                       | -                                                                                  |
| 32A                   | 83.2  | 5.19       | d 2.6  | 31A                            | 27A, 30A, 31A, 33-NCH <sub>3</sub> A, 34A                                          |
| 32B                   | 89.4  | 4.50       | d 4.0  | 31B                            | 27B, 30B, 31B, [32B], 33-NCH <sub>3</sub> B, 34B                                   |
| 32C                   | 90.3  | 4.25       | d 9.9  | 31C                            | 27C, 31C, 33-NCH <sub>3</sub> C, 34C                                               |
| 32D                   | 128.5 | 6.72, 6.76 | d 14.3 | 31D                            | 30D, 31D, 33-NCH <sub>3</sub> D, 34D                                               |
| 32E                   | 123.7 | 6.95, 7.01 | d      | 31E                            | 30E, 31E, [32E], 33-NCH <sub>3</sub> E                                             |
| 33-NCH <sub>3</sub> A | 28.6  | 2.86       | s      | -                              | 32A, [33-NCH <sub>3</sub> A], 34A                                                  |
| 33-NCH <sub>3</sub> B | 25.7  | 2.72       | s      | -                              | 32B, [33-NCH <sub>3</sub> B], 34B                                                  |
| 33-NCH <sub>3</sub> C | 24.3  | 2.61       | s      | -                              | 32C, [33-NCH <sub>3</sub> C], 34C                                                  |
| 33-NCH <sub>3</sub> D | 26.5  | 2.86       | s      | -                              | 32D, [33-NCH <sub>3</sub> D], 34D                                                  |
| 33-NCH <sub>3</sub> E | 32.3  | 2.98       | s      | -                              | 32E, [33-NCH <sub>3</sub> E], 34E                                                  |
| 34A                   | 163.7 | 8.18       | s      | -                              | 32A, 33-NCH <sub>3</sub> A, [34A]                                                  |
| 34B                   | 162.2 | 8.26       | s      | -                              | 32B, 33-NCH <sub>3</sub> B, [34B]                                                  |
| 34C                   | 163.2 | 8.22       | s      | -                              | 32C, 33-NCH <sub>3</sub> C, [34C]                                                  |
| 34D                   | 162.3 | 8.34       | s      | -                              | 32D, 33-NCH <sub>3</sub> D, [34D]                                                  |
| 34E                   | 161.1 | 8.07       | s      | -                              | 32E, 33-NCH <sub>3</sub> E, [34E]                                                  |

**Table S3.** Scytophycin variants (No and Name), retention times ( $R_t$ ), experimental (Exp) and calculated (Cal) ion masses ( $m/z$ ) of  $[M + H - H_2O]^+$ ,  $[M + Na]^+$  and  $[hk - 4H + Na]^+$ , mass error ( $\Delta$ ) in ppm, molecular formula and frequency in strains HAN3/2 = *Scytonema* sp. HAN3/2, HAN11/1 = *Nostoc* sp. HAN11/1, HAN21/1 = *Anabaena* sp. HAN21/1 and PH133 = *Anabaena cf. cylindrica* PH133. hk = product ion of the sodiated scytophycin, see Figure S8. Accurate mass measurements obtained with Q-TOF and others with ion trap.

| No | Variant<br>Name (Sc = scytophycin) | $R_t$<br>(min) | $(m/z)$                   |                     |          | $\Delta$<br>(ppm) | Formula               | $(m/z)$                   |          |         | $\Delta$<br>(ppm)  | Formula | Strain |         |         |       |
|----|------------------------------------|----------------|---------------------------|---------------------|----------|-------------------|-----------------------|---------------------------|----------|---------|--------------------|---------|--------|---------|---------|-------|
|    |                                    |                | $[M + H - H_2O]^+$<br>Exp | $[M + Na]^+$<br>Cal | $\Delta$ |                   |                       | $[hk - 4H + Na]^+$<br>Exp | $\Delta$ | Formula |                    |         | HAN3/2 | HAN11/1 | HAN21/1 | PH133 |
| 1  | 6-OH-7-OMe-Sc                      | 18.1           | 848.5                     | 888.5               |          |                   |                       | 620.4133                  |          |         |                    | -       | +      | -       | -       |       |
| 2  | 6-OH-7-OMe-17-OH-Sc-D/E            | 18.9           | 820.5                     | 860.5               |          |                   |                       | 608.4133                  |          |         |                    | -       | +      | -       | -       |       |
| 3  | 6-OH-7-OMe-Sc                      | 18.9           | 864.5                     | 904.5               |          |                   |                       | 652.4031                  |          |         |                    | -       | +      | -       | -       |       |
| 4  | Sc                                 | 19.3           | 774.5                     | 814.5               |          |                   |                       |                           |          |         |                    | +       | -      | -       | -       |       |
| 5  | 6-OH-Sc-D/E                        | 19.3           | 820.5                     | 860.5               |          |                   |                       | 622.4289                  |          |         |                    | -       | +      | -       | -       |       |
| 6  | 6-OH-Sc-B                          | 19.4           | 818.5                     | 858.4951            | 858.4974 | -2.69             | $C_{45}H_{73}NO_{13}$ | 620.4133                  |          |         |                    | +       | -      | -       | +       |       |
| 7  | Sc                                 | 19.4           | 834.5                     | 874.5               |          |                   |                       |                           |          |         |                    | +       | -      | -       | -       |       |
| 8  | 6-OH-7-OMe-Sc-D/E                  | 19.5           | 850.5                     | 890.5               |          |                   |                       | 638.4239                  |          |         |                    | -       | +      | -       | -       |       |
| 9  | Sc                                 | 19.8           | 818.5                     | 858.5               |          |                   |                       | 636.4082                  |          |         |                    | -       | -      | -       | +       |       |
| 10 | 6-OH-7-OMe-15-O-deMe-Sc-B          | 19.9           | 818.5                     | 858.5               |          |                   |                       | 606.4340                  |          |         |                    | -       | ++     | -       | -       |       |
| 11 | Sc                                 | 20.0           | 774.5                     | 814.5               |          |                   |                       |                           |          |         |                    | +       | -      | -       | +       |       |
| 12 | Sc                                 | 20.0           | 804.5                     | 844.5               |          |                   |                       | 606.3976                  |          |         |                    | +       | +      | -       | -       |       |
| 13 |                                    | 20.0           | 834.5                     | 874.5               |          |                   |                       |                           |          |         |                    | +       | -      | -       | -       |       |
| 14 | 29-OH-Sc-B                         | 20.1           | 788.5                     | 828.5               |          |                   |                       | 606.3976                  |          |         |                    | +       | -      | -       | -       |       |
| 15 | 6-OH-7-OMe-Sc-D/E                  | 20.1           | 834.5                     | 874.5               |          |                   |                       | 622.4289                  |          |         |                    | -       | ++     | -       | -       |       |
| 16 | X-OH-Sc-D/E (not 6-OH)             | 20.3           | 820.5                     | 860.5116            | 860.5131 | -1.70             | $C_{45}H_{75}NO_{13}$ | 638.4239                  |          |         |                    | ++      | -      | +       | ++      |       |
| 17 | Sc                                 | 20.4           | 834.5                     | 874.5               |          |                   |                       | 652.4395                  |          |         |                    | +       | -      | -       | +       |       |
| 18 | Sc-D/E                             | 20.6           | 804.5                     | 844.5157            | 844.5181 | -2.90             | $C_{45}H_{75}NO_{12}$ | 622.3926                  | 622.3926 | 0.08    | $C_{32}H_{57}NO_9$ | ++      | -      | +       | ++      |       |
| 19 | Sc                                 | 20.6           | 814.5                     | -                   |          |                   |                       |                           |          |         |                    | -       | ++     | -       | -       |       |
| 20 | 6-OH-7-OMe-Sc-B                    | 20.6           | 832.5                     | 872.5               |          |                   |                       | 620.4133                  |          |         |                    | -       | +++    | +       | -       |       |
| 21 | Sc                                 | 20.8           | 788.5                     | 828.4861            | 828.4868 | -0.90             | $C_{44}H_{71}NO_{12}$ | 606.3602                  | 606.3613 | -1.74   | $C_{31}H_{53}NO_9$ | +       | -      | +       | +       |       |
| 22 | Sc                                 | 20.9           | 802.5                     | 842.5               |          |                   |                       |                           |          |         |                    | ++      | -      | +       | -       |       |

Table S3. Cont.

|    |                   |      |       |          |          |       |                                                  |          |          |       |                                                  |     |    |     |     |
|----|-------------------|------|-------|----------|----------|-------|--------------------------------------------------|----------|----------|-------|--------------------------------------------------|-----|----|-----|-----|
| 23 | Sc                | 21.0 | 804.5 | 844.5    |          |       |                                                  | 622.4289 |          |       |                                                  | +   | +  | +   | +   |
| 24 | Sc                | 21.2 | 774.5 | 814.5063 | 814.5076 | -1.58 | C <sub>44</sub> H <sub>73</sub> NO <sub>11</sub> | 592.3782 | 592.3820 | -6.40 | C <sub>31</sub> H <sub>55</sub> NO <sub>8</sub>  | +   | +  | +   | -   |
| 25 | Sc-B              | 21.3 | 802.5 | 842.5022 | 842.5025 | -0.35 | C <sub>45</sub> H <sub>73</sub> NO <sub>12</sub> | 620.3766 | 620.3769 | -0.49 | C <sub>32</sub> H <sub>55</sub> NO <sub>9</sub>  | +++ | ++ | ++  | +++ |
| 26 | Sc                | 21.9 | 786.5 | 826.5062 | 826.5076 | -1.67 | C <sub>45</sub> H <sub>73</sub> NO <sub>11</sub> | 604.3822 | 604.3820 | 0.35  | C <sub>32</sub> H <sub>55</sub> NO <sub>8</sub>  | ++  | +  | +   | ++  |
| 27 | Sc-C              | 22.4 | 788.5 | 828.5221 | 828.5232 | -1.37 | C <sub>45</sub> H <sub>75</sub> NO <sub>11</sub> | 606.3971 | 606.3976 | -0.89 | C <sub>32</sub> H <sub>57</sub> NO <sub>8</sub>  | ++  | ++ | +   | ++  |
| 28 | 7-OMe-Sc          | 22.5 | 834.5 | 874.5    |          |       |                                                  |          |          |       |                                                  | -   | -  | +   | -   |
| 29 | 7-OMe-29-OAc-Sc-B | 22.6 | 844.5 | 884.5129 | 884.5131 | -0.18 | C <sub>47</sub> H <sub>75</sub> NO <sub>13</sub> | 648.3705 | 648.3718 | -2.03 | C <sub>33</sub> H <sub>55</sub> NO <sub>10</sub> | -   | -  | ++  | -   |
| 30 | 7-OMe-Sc-B (1)    | 23.5 | 816.5 | 856.5    | 856.5181 |       |                                                  |          | 620.4133 |       |                                                  | +   | +  | +++ | +++ |
| 31 | 7-OMe-Sc          | 24.0 | 800.5 | 840.5    | 840.4868 |       |                                                  |          | 604.3820 |       |                                                  | -   | +  | ++  | +   |
| 32 | Sc                | 24.8 | 743.5 | 783.5    | 783.4654 |       |                                                  |          | 561.3762 |       |                                                  | +   | -  | -   | +   |
| 33 | 7-OMe-Sc-C        | 24.9 | 802.5 | 842.5    | 842.5389 |       |                                                  |          | 606.4340 |       |                                                  | -   | +  | +   | +   |

**Table S4.** Previously published scytophycin variants, their monoisotopic masses (M), positions of the variable functional groups. 6-OH-7-OMe-scytophycin B = tolytoxin A. Carbon numbers in Figure S8.

| No | Name                     | M     | C-6 | C-7  | C-16                 | C-19 | C-23 | C-27 | Reference |
|----|--------------------------|-------|-----|------|----------------------|------|------|------|-----------|
| 1  | Scytophycin A            | 821.5 | -H  | -OH  | -epoxy               | -OMe | -OH  | -OH  | [1]       |
| 2  | Scytophycin B            | 819.5 | -H  | -OH  | -epoxy               | -OMe | -OH  | =O   | [1]       |
| 3  | Scytophycin C            | 805.5 | -H  | -OH  | -Me                  | -OMe | -OH  | =O   | [2]       |
| 4  | Scytophycin D            | 821.5 | -H  | -OH  | -(OH)CH <sub>3</sub> | -OMe | -OH  | =O   | [2]       |
| 5  | Scytophycin E            | 821.5 | -H  | -OH  | -CH <sub>2</sub> OH  | -OMe | -OH  | =O   | [2]       |
| 6  | 6-OH-7-OMe-scytophycin B | 849.5 | -OH | -OMe | -epoxy               | -OMe | -OH  | =O   | [3]       |
| 7  | 23-Ac-tolytoxin A        | 891.5 | -OH | -OMe | -epoxy               | -OMe | -OAc | =O   | [4]       |
| 8  | 6-OH-scytophycin B       | 835.5 | -OH | -OH  | -epoxy               | -OMe | -OH  | =O   | [3]       |
| 9  | 7-Ac-scytophycin B       | 861.5 | -H  | -OAc | -epoxy               | -OMe | -OH  | =O   | [1]       |
| 10 | 7-OMe-scytophycin B      | 833.5 | -H  | -OMe | -epoxy               | -OMe | -OH  | =O   | [5]       |

Table S4. Cont.

|    |                               |       |     |      |                                           |      |     |    |     |
|----|-------------------------------|-------|-----|------|-------------------------------------------|------|-----|----|-----|
| 11 | 19-O-deMe-scytophycin C       | 791.5 | -H  | -OH  | -Me                                       | -OH  | -OH | =O | [3] |
| 12 | 6-OH-7-OMe-scytophycin E      | 851.5 | -OH | -OMe | -CH <sub>2</sub> OH                       | -OMe | -OH | =O | [3] |
| 13 | 6-OH-scytophycin D/E          | 837.5 | -OH | -OH  | -(OH)CH <sub>3</sub> /-CH <sub>2</sub> OH | -OMe | -OH | =O | [5] |
| 14 | 7-OMe-19-deMe-scytophycin D/E | 821.5 | -H  | -OMe | -(OH)CH <sub>3</sub> /-CH <sub>2</sub> OH | -OH  | -OH | =O | [5] |

**Table S5.** Sodiated ion  $[M + Na]^+$  mass ( $m/z$ ), product ions and their  $m/z$ , intensities and comments concerning the tentative structures of scytophycin variants No 1–33. Ion structures a–n are presented in Figure S8.

| No | $[M+Na]^+$<br>( $m/z$ ) | Diagnostic Product Ions (x if Same As in the Column Header) and Intensities (Superscripts) from $[M + Na]^+$ ( $m/z$ ) |                 |                           |                 |                  |                   |                                   |                    |                   |                      |                   |                  |                    |                      |                      | Comment (+ and –<br>Compared to<br>Sc No25) |                           |
|----|-------------------------|------------------------------------------------------------------------------------------------------------------------|-----------------|---------------------------|-----------------|------------------|-------------------|-----------------------------------|--------------------|-------------------|----------------------|-------------------|------------------|--------------------|----------------------|----------------------|---------------------------------------------|---------------------------|
|    |                         | a-2H<br>262                                                                                                            | b-2H<br>320     | c-H <sub>2</sub> O<br>332 | dk-2H<br>390    | ek-4H<br>460     | fk-4H<br>490      | gk-(2H + H <sub>2</sub> O)<br>560 | hk-4H<br>620       | ik-4H<br>686      | jk-2H<br>718         | l 545<br>1545     | lhk-4H<br>323    | m 687<br>687       | mhk-4H<br>465        | n 731<br>731         |                                             |                           |
| 1  | 888.5                   | x <sup>3</sup>                                                                                                         | x <sup>26</sup> | x <sup>1</sup>            | x <sup>9</sup>  | x <sup>6</sup>   | x <sup>7</sup>    | x <sup>6</sup>                    | x <sup>100</sup>   | 660 <sup>30</sup> | 732 <sup>3</sup>     | 591 <sup>13</sup> | x <sup>2</sup>   | 733 <sup>3</sup>   | x <sup>1</sup>       | 777 <sup>1</sup>     | -                                           |                           |
| 2  | 860.5                   | x <sup>1</sup>                                                                                                         | x <sup>19</sup> | x <sup>1</sup>            | x <sup>6</sup>  | 446 <sup>1</sup> | 476 <sup>14</sup> | 548 <sup>2</sup>                  | 608 <sup>100</sup> | 720 <sup>8</sup>  | 734 <sup>1</sup>     | 563 <sup>5</sup>  | x <sup>-</sup>   | 705 <sup>1</sup>   | 453 <sup>1</sup>     | 749 <sup>&lt;1</sup> | -                                           |                           |
| 3  | 904.5                   | x <sup>1</sup>                                                                                                         | x <sup>18</sup> | x <sup>3</sup>            | x <sup>7</sup>  | x <sup>5</sup>   | x <sup>14</sup>   | x <sup>-</sup>                    | 652 <sup>100</sup> | 718 <sup>1</sup>  | 764 <sup>1</sup>     | x <sup>-</sup>    | x <sup>2</sup>   | 749 <sup>2</sup>   | 497 <sup>1</sup>     | 793 <sup>1</sup>     | -                                           | +2 x O in C13–34          |
| 4  | 814.5                   | x <sup>2</sup>                                                                                                         | x <sup>25</sup> | x <sup>2</sup>            | x <sup>15</sup> | x <sup>-</sup>   | -                 | 532 <sup>1</sup>                  | 592 <sup>100</sup> | 658 <sup>1</sup>  | 736 <sup>3</sup>     | 517 <sup>2</sup>  | 295 <sup>1</sup> | 673 <sup>100</sup> | -                    | 703 <sup>-</sup>     | -                                           | -28 Da                    |
| 5  | 860.5                   | x <sup>2</sup>                                                                                                         | x <sup>15</sup> | x <sup>1</sup>            | x <sup>5</sup>  | x <sup>2</sup>   | x <sup>3</sup>    | 562 <sup>1</sup>                  | 622 <sup>100</sup> | 688 <sup>5</sup>  | x <sup>1</sup>       | 563 <sup>7</sup>  | 325 <sup>3</sup> | 705 <sup>2</sup>   | 467 <sup>1</sup>     | 749 <sup>&lt;1</sup> | -                                           |                           |
| 6  | 858.5                   | x <sup>7</sup>                                                                                                         | x <sup>42</sup> | x <sup>1</sup>            | x <sup>8</sup>  | x <sup>6</sup>   | x <sup>11</sup>   | x <sup>4</sup>                    | x <sup>100</sup>   | 686 <sup>4</sup>  | x <sup>1</sup>       | 561 <sup>13</sup> | x <sup>4</sup>   | 703 <sup>7</sup>   | x <sup>1</sup>       | 747 <sup>&lt;1</sup> | -                                           |                           |
| 7  | 874.5                   | x <sup>1</sup>                                                                                                         | x <sup>5</sup>  | x <sup>-</sup>            | x <sup>2</sup>  | x <sup>1</sup>   | x <sup>1</sup>    | 592 <sup>2</sup>                  | 652 <sup>100</sup> | 718 <sup>2</sup>  | x <sup>2</sup>       | 577 <sup>4</sup>  | 355 <sup>3</sup> | 719 <sup>1</sup>   | 497 <sup>&lt;1</sup> | 763 <sup>&lt;1</sup> | -                                           | +32 Da (2O) in ion<br>lhk |
| 8  | 890.5                   | x <sup>&lt;1</sup>                                                                                                     | x <sup>9</sup>  | x <sup>-</sup>            | x <sup>4</sup>  | x <sup>1</sup>   | x <sup>2</sup>    | 578 <sup>2</sup>                  | 638 <sup>100</sup> | 704 <sup>-</sup>  | 750 <sup>1</sup>     | 593 <sup>3</sup>  | 341 <sup>2</sup> | 735 <sup>3</sup>   | 483 <sup>1</sup>     | 779 <sup>-</sup>     | ek-4H:<br>476 <sup>2</sup>                  | +16 Da (O) in<br>ion lhk  |
| 9  | 858.5                   | x <sup>2</sup>                                                                                                         | x <sup>12</sup> | x <sup>2</sup>            | x <sup>4</sup>  | x <sup>7</sup>   | x <sup>9</sup>    | 576 <sup>2</sup>                  | 636 <sup>100</sup> | 702 <sup>3</sup>  | 734 <sup>-</sup>     | 561 <sup>5</sup>  | 339 <sup>1</sup> | 703 <sup>-</sup>   | 481 <sup>1</sup>     | 747 <sup>-</sup>     | -                                           | +16 Da (O)                |
| 10 | 858.5                   | x <sup>2</sup>                                                                                                         | x <sup>12</sup> | x <sup>4</sup>            | x <sup>6</sup>  | x <sup>2</sup>   | x <sup>3</sup>    | 546 <sup>4</sup>                  | 606 <sup>100</sup> | 672 <sup>-</sup>  | 718 <sup>&lt;1</sup> | 561 <sup>5</sup>  | 309 <sup>2</sup> | 703 <sup>3</sup>   | 451 <sup>-</sup>     | 747 <sup>1</sup>     | -                                           | 16-CH <sub>3</sub>        |
| 11 | 814.5                   | x <sup>9</sup>                                                                                                         | x <sup>21</sup> | x <sup>2</sup>            | x <sup>9</sup>  | 432 <sup>2</sup> | 462 <sup>2</sup>  | 532 <sup>1</sup>                  | 592 <sup>100</sup> | 658 <sup>2</sup>  | 690 <sup>-</sup>     | 517 <sup>3</sup>  | 295 <sup>2</sup> | 659 <sup>5</sup>   | 437 <sup>1</sup>     | 703 <sup>-</sup>     | -                                           | -28 Da in ion lhk         |

Table S5. Cont.

|    |       |                    |                 |                    |                 |                    |                  |                  |                    |                      |                      |                   |                      |                    |                      |                      |                                                             |                                                |
|----|-------|--------------------|-----------------|--------------------|-----------------|--------------------|------------------|------------------|--------------------|----------------------|----------------------|-------------------|----------------------|--------------------|----------------------|----------------------|-------------------------------------------------------------|------------------------------------------------|
| 12 | 844.5 | x <sup>9</sup>     | x <sup>51</sup> | x <sup>2</sup>     | x <sup>16</sup> | 444 <sup>1</sup>   | 476 <sup>3</sup> | 546 <sup>3</sup> | 606 <sup>100</sup> | 688 <sup>7</sup>     | 704 <sup>OP</sup>    | 547 <sup>11</sup> | 309 <sup>1</sup>     | 689 <sup>5</sup>   | 451 <sup>2</sup>     | 733 <sup>&lt;1</sup> | 416 <sup>5</sup> , 587 <sup>10</sup> ,<br>703 <sup>20</sup> | Detailed structure<br>not identifiable         |
| 13 | 874.5 | x <sup>3</sup>     | x <sup>15</sup> | x <sup>&lt;1</sup> | x <sup>3</sup>  | x <sup>7</sup>     | x <sup>5</sup>   | x <sup>1</sup>   | x <sup>100</sup>   | x <sup>2</sup>       | x <sup>5</sup>       | 577 <sup>3</sup>  | x <sup>1</sup>       | 719 <sup>-</sup>   | x <sup>&lt;1</sup>   | 763 <sup>-</sup>     |                                                             | +32 in C1-12                                   |
| 14 | 828.5 | x <sup>&lt;1</sup> | x <sup>13</sup> | x <sup>1</sup>     | x <sup>3</sup>  | x <sup>&lt;1</sup> | x <sup>3</sup>   | 546 <sup>5</sup> | 606 <sup>59</sup>  | 671 <sup>2</sup>     | 704 <sup>1</sup>     | x <sup>OP</sup>   | x <sup>1</sup>       | 687 <sup>100</sup> | x <sup>29</sup>      | 717 <sup>-</sup>     | 306 <sup>2</sup> , 546 <sup>5</sup> ,<br>564 <sup>25</sup>  | Spectrum<br>contaminated from<br>ion m/z 830.5 |
| 15 | 874.5 | x <sup>3</sup>     | x <sup>11</sup> | x <sup>3</sup>     | x <sup>5</sup>  | x <sup>1</sup>     | x <sup>3</sup>   | 562 <sup>2</sup> | 622 <sup>100</sup> | 688 <sup>&lt;1</sup> | 734 <sup>2</sup>     | 577 <sup>5</sup>  | 325 <sup>2</sup>     | 719 <sup>1</sup>   | 467 <sup>1</sup>     | 763 <sup>OP</sup>    |                                                             |                                                |
| 16 | 860.5 | x <sup>1</sup>     | x <sup>9</sup>  | -                  | x <sup>4</sup>  | x <sup>&lt;1</sup> | x <sup>2</sup>   | 578 <sup>1</sup> | 638 <sup>100</sup> | 704 <sup>2</sup>     | 736 <sup>-</sup>     | 563 <sup>4</sup>  | 341 <sup>2</sup>     | 705 <sup>1</sup>   | 483 <sup>1</sup>     | 749 <sup>1</sup>     |                                                             | +18 Da (2H, O)<br>in ion lhc                   |
| 17 | 874.5 | x <sup>1</sup>     | x <sup>5</sup>  | -                  | x <sup>2</sup>  | x <sup>1</sup>     | x <sup>1</sup>   | 592 <sup>2</sup> | 652 <sup>100</sup> | 718 <sup>2</sup>     | 750 <sup>-</sup>     | 577 <sup>4</sup>  | 355 <sup>3</sup>     | 719 <sup>1</sup>   | 497 <sup>&lt;1</sup> | 763 <sup>-</sup>     |                                                             | +32 Da (2O) in<br>ion lhc                      |
| 18 | 844.5 | x <sup>1</sup>     | x <sup>14</sup> | x <sup>&lt;1</sup> | x <sup>4</sup>  | x <sup>1</sup>     | x <sup>3</sup>   | 562 <sup>2</sup> | 622 <sup>100</sup> | 688 <sup>2</sup>     | 720 <sup>-</sup>     | 547 <sup>3</sup>  | 325 <sup>2</sup>     | 689 <sup>2</sup>   | 467 <sup>3</sup>     | 733 <sup>-</sup>     |                                                             |                                                |
| 20 | 872.5 | x <sup>2</sup>     | x <sup>24</sup> | x <sup>2</sup>     | x <sup>7</sup>  | x <sup>4</sup>     | x <sup>3</sup>   | x <sup>1</sup>   | x <sup>100</sup>   | x <sup>OP</sup>      | 732 <sup>&lt;1</sup> | 575 <sup>6</sup>  | x <sup>1</sup>       | 717 <sup>3</sup>   | x <sup>&lt;1</sup>   | 761 <sup>-</sup>     | jk-4H:730 <sup>3</sup>                                      |                                                |
| 21 | 828.5 | x <sup>3</sup>     | x <sup>25</sup> | x <sup>&lt;1</sup> | x <sup>9</sup>  | x <sup>3</sup>     | x <sup>5</sup>   | 546 <sup>3</sup> | 606 <sup>100</sup> | 672 <sup>2</sup>     | 704 <sup>-</sup>     | 531 <sup>5</sup>  | 309 <sup>2</sup>     | 673 <sup>3</sup>   | 451 <sup>1</sup>     | 717 <sup>-</sup>     | 562 <sup>65</sup>                                           | -CH <sub>2</sub> from ion lhc                  |
| 22 | 842.5 | x <sup>1</sup>     | x <sup>1</sup>  | x <sup>7</sup>     | -               | x <sup>1</sup>     | x <sup>4</sup>   | x <sup>2</sup>   | x <sup>100</sup>   | x <sup>1</sup>       | x <sup>-</sup>       | x <sup>-</sup>    | x <sup>-</sup>       | x <sup>OP</sup>    | x <sup>1</sup>       | x <sup>-</sup>       |                                                             | Detailed structure<br>not identifiable         |
| 23 | 844.5 | x <sup>2</sup>     | x <sup>19</sup> | x <sup>1</sup>     | x <sup>5</sup>  | x <sup>&lt;1</sup> | x <sup>2</sup>   | 562 <sup>3</sup> | 622 <sup>100</sup> | 688 <sup>&lt;1</sup> | 720 <sup>-</sup>     | 547 <sup>4</sup>  | 325 <sup>2</sup>     | 689 <sup>1</sup>   | 467 <sup>&lt;1</sup> | 733 <sup>-</sup>     |                                                             | Detailed structure<br>not identifiable         |
| 24 | 814.5 | x <sup>2</sup>     | x <sup>25</sup> | x <sup>2</sup>     | x <sup>15</sup> | x <sup>1</sup>     | x <sup>-</sup>   | 532 <sup>1</sup> | 592 <sup>100</sup> | 658 <sup>1</sup>     | 690 <sup>-</sup>     | 517 <sup>2</sup>  | 295 <sup>&lt;1</sup> | 659 <sup>2</sup>   | 437 <sup>&lt;1</sup> | 703 <sup>1</sup>     |                                                             | -28 Da (C and O)                               |
| 25 | 842.5 | x <sup>3</sup>     | x <sup>15</sup> | x <sup>&lt;1</sup> | x <sup>4</sup>  | x <sup>4</sup>     | x <sup>4</sup>   | x <sup>3</sup>   | x <sup>100</sup>   | x <sup>1</sup>       | x <sup>1</sup>       | x <sup>3</sup>    | x <sup>2</sup>       | x <sup>1</sup>     | x <sup>&lt;1</sup>   | x <sup>&lt;1</sup>   |                                                             |                                                |
| 26 | 826.5 | x <sup>3</sup>     | x <sup>30</sup> | x <sup>2</sup>     | x <sup>6</sup>  | -                  | -                | 544 <sup>4</sup> | 604 <sup>100</sup> | 670 <sup>1</sup>     | x <sup>1</sup>       | 529 <sup>3</sup>  | 307 <sup>1</sup>     | 671 <sup>1</sup>   | 449 <sup>&lt;1</sup> | 715 <sup>&lt;1</sup> |                                                             | -16 (O) from<br>C15/16/17/19                   |
| 27 | 828.5 | x <sup>3</sup>     | x <sup>22</sup> | x <sup>1</sup>     | x <sup>6</sup>  | x <sup>2</sup>     | x <sup>1</sup>   | 546 <sup>1</sup> | 606 <sup>100</sup> | 672 <sup>2</sup>     | 704 <sup>-</sup>     | 531 <sup>2</sup>  | 309 <sup>1</sup>     | 673 <sup>OP</sup>  | 451 <sup>2</sup>     | 717 <sup>-</sup>     |                                                             |                                                |



Table S5. Cont.

|    |       |                    |                  |                      |                  |                    |                    |                   |                    |                      |                      |                  |                  |                    |                      |                    |                                                              |                               |
|----|-------|--------------------|------------------|----------------------|------------------|--------------------|--------------------|-------------------|--------------------|----------------------|----------------------|------------------|------------------|--------------------|----------------------|--------------------|--------------------------------------------------------------|-------------------------------|
| 28 | 874.5 | x <sup>&lt;1</sup> | x <sup>7</sup>   | x <sup>&lt;1</sup>   | x <sup>3</sup>   | x <sup>2</sup>     | x <sup>4</sup>     | 578 <sup>3</sup>  | 638 <sup>100</sup> | 704 <sup>op</sup>    | 750 <sup>·</sup>     | 577 <sup>2</sup> | 341 <sup>4</sup> | 719 <sup>1</sup>   | 483 <sup>1</sup>     | 763 <sup>·</sup>   | +18 Da (2H, O) in<br>ion lhk                                 |                               |
| 29 | 884.5 | 290 <sup>·</sup>   | 348 <sup>7</sup> | 360 <sup>&lt;1</sup> | 418 <sup>3</sup> | 488 <sup>·</sup>   | 458 <sup>2</sup>   | 588 <sup>op</sup> | 648 <sup>55</sup>  | 714 <sup>1</sup>     | 732 <sup>·</sup>     | 559 <sup>7</sup> | x <sup>7</sup>   | 701 <sup>5</sup>   | x <sup>5</sup>       | 759 <sup>·</sup>   | 288 <sup>6</sup> , 528 <sup>17</sup> ,<br>588 <sup>100</sup> | -OAc cleave as<br>HAc (60 Da) |
| 30 | 856.5 | x <sup>2</sup>     | x <sup>20</sup>  | x <sup>2</sup>       | x <sup>4</sup>   | x <sup>5</sup>     | x <sup>5</sup>     | x <sup>3</sup>    | x <sup>100</sup>   | 686 <sup>·</sup>     | 732 <sup>·</sup>     | 559 <sup>5</sup> | x <sup>5</sup>   | 701 <sup>1</sup>   | x <sup>2</sup>       | 745 <sup>·</sup>   |                                                              |                               |
| 31 | 840.5 | x <sup>5</sup>     | x <sup>27</sup>  | x <sup>&lt;1</sup>   | x <sup>4</sup>   | x <sup>&lt;1</sup> | x <sup>&lt;1</sup> | 544 <sup>4</sup>  | 604 <sup>100</sup> | 670 <sup>·</sup>     | 716 <sup>&lt;1</sup> | 543 <sup>5</sup> | 207 <sup>1</sup> | 685 <sup>1</sup>   | 449 <sup>1</sup>     | x <sup>&lt;1</sup> | -16 Da (O) from<br>C15/16/17                                 |                               |
| 32 | 783.5 | 203 <sup>·</sup>   | 261 <sup>·</sup> | 273 <sup>&lt;1</sup> | 331 <sup>2</sup> | 401 <sup>6</sup>   | 431 <sup>7</sup>   | 501 <sup>1</sup>  | 561 <sup>100</sup> | 627 <sup>2</sup>     | 659 <sup>1</sup>     | x <sup>·</sup>   | x <sup>1</sup>   | x <sup>&lt;1</sup> | x <sup>&lt;1</sup>   | x <sup>·</sup>     | -59 Da<br>(H <sub>3</sub> CNHCHO)                            |                               |
| 33 | 842.5 | x <sup>1</sup>     | x <sup>37</sup>  | x <sup>3</sup>       | x <sup>5</sup>   | -                  | x <sup>2</sup>     | 546 <sup>op</sup> | 606 <sup>100</sup> | 672 <sup>&lt;1</sup> | x <sup>1</sup>       | x <sup>2</sup>   | 309 <sup>1</sup> | 687 <sup>1</sup>   | 451 <sup>&lt;1</sup> | x <sup>·</sup>     |                                                              |                               |

<sup>op</sup> = Overlapping peaks.

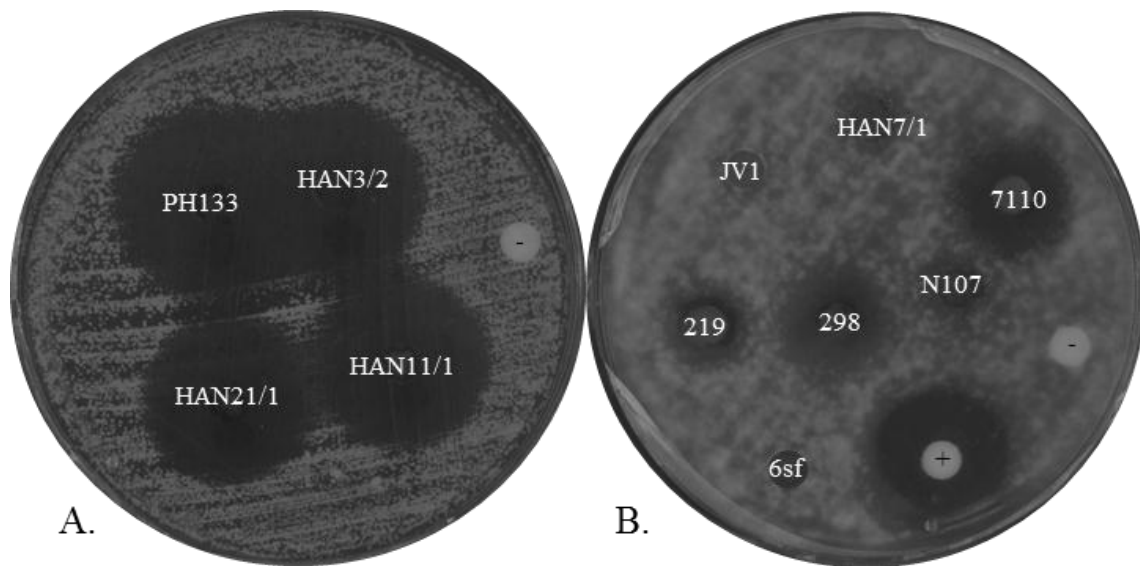

**Figure S1.** Disc diffusion bioassay using cyanobacterial extracts against *Candida albicans* (A) and *Aspergillus flavus* (B). PH133 = *Anabaena cf. cylindrica* PH133; HAN3/2 = *Scytonema* sp. HAN3/2; HAN21/1 = *Anabaena* sp. HAN21/1; HAN11/1 = *Nostoc* sp. HAN11/1; HAN7/1 = *Anabaena* sp. HAN7/1; JV 1 = *Anabaena* sp. BIR JV1; 219 = *Nostoc* sp. CENA 219; 6sf = *Nostoc calcicula* 6 sf Calc; 298 = *Fischerella* sp. CENA 298; N107 = *Nostoc* sp. N107.3; 7110 = *Scytonema hofmanni* PCC 7110; – is negative control with methanol and + is 0.1 mg of nystatin (Sigma-Aldrich, St. Louis, MO, USA).

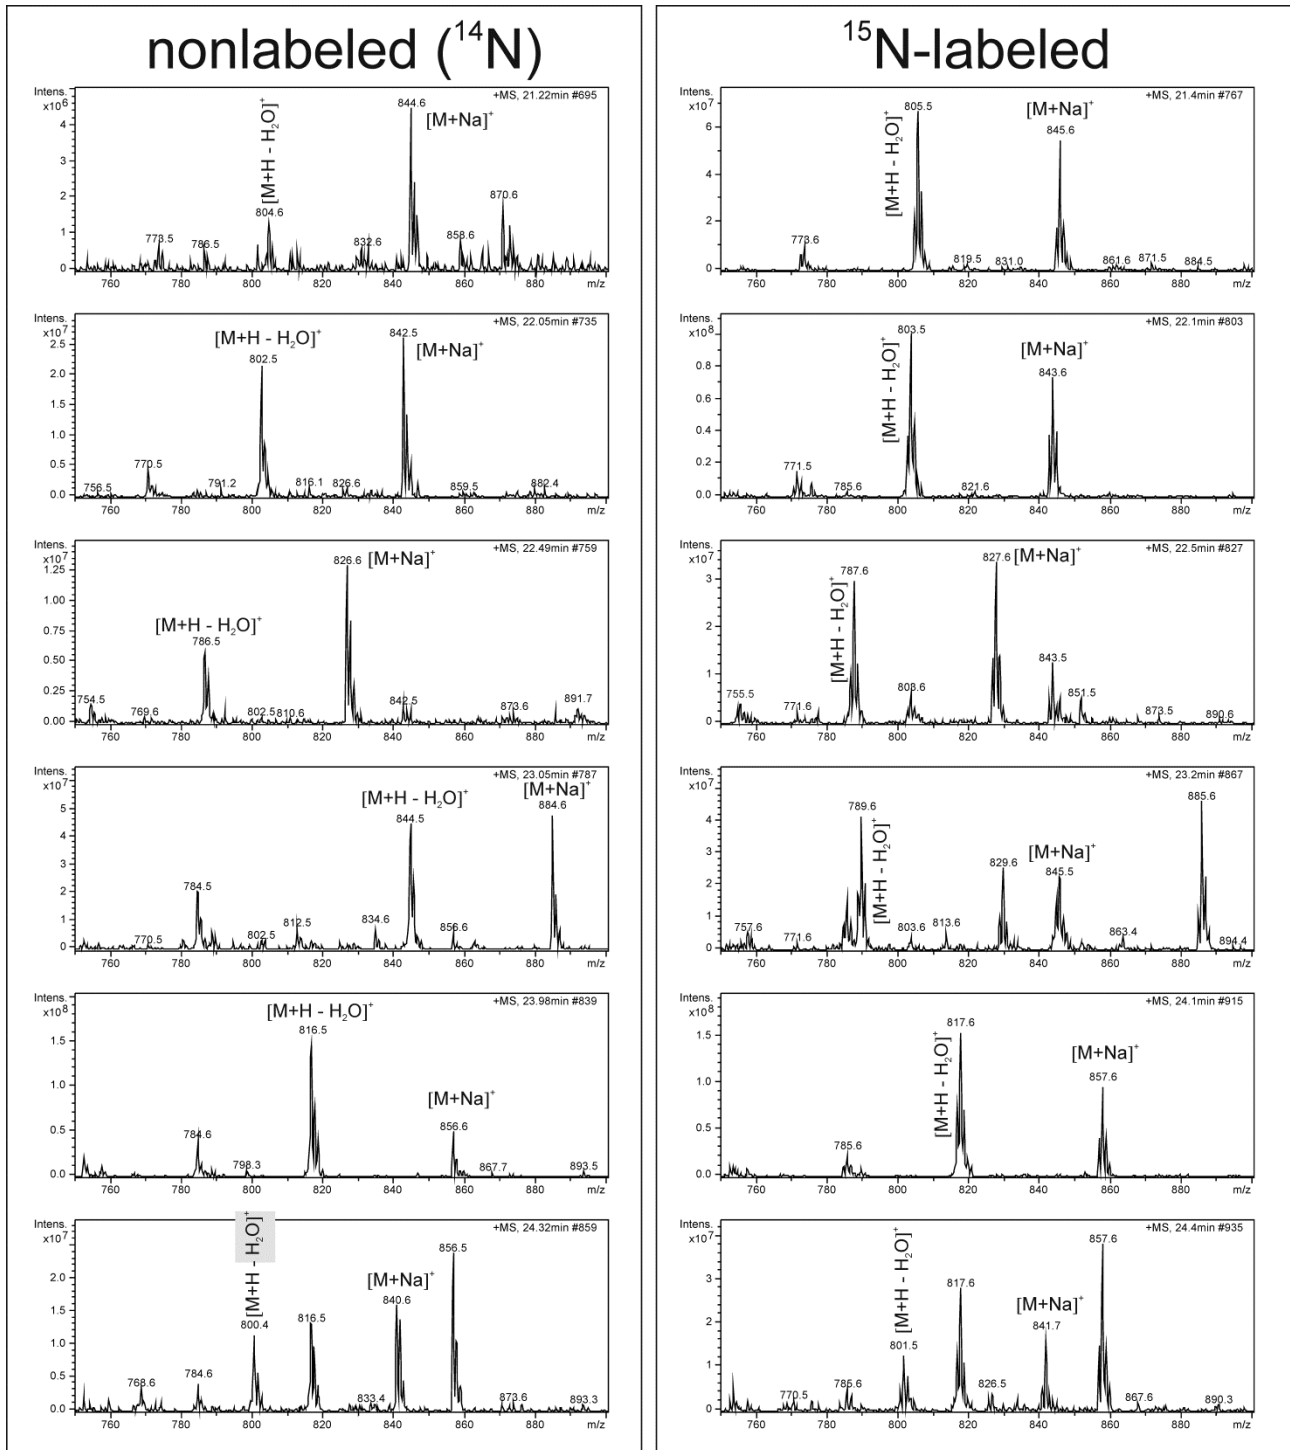

**Figure S2.** Nonlabeled ( $^{14}\text{N}$ ) and  $^{15}\text{N}$ -labeled sodiated and dehydrated protonated scytopycin ions from *Anabaena* sp. HAN21/1.



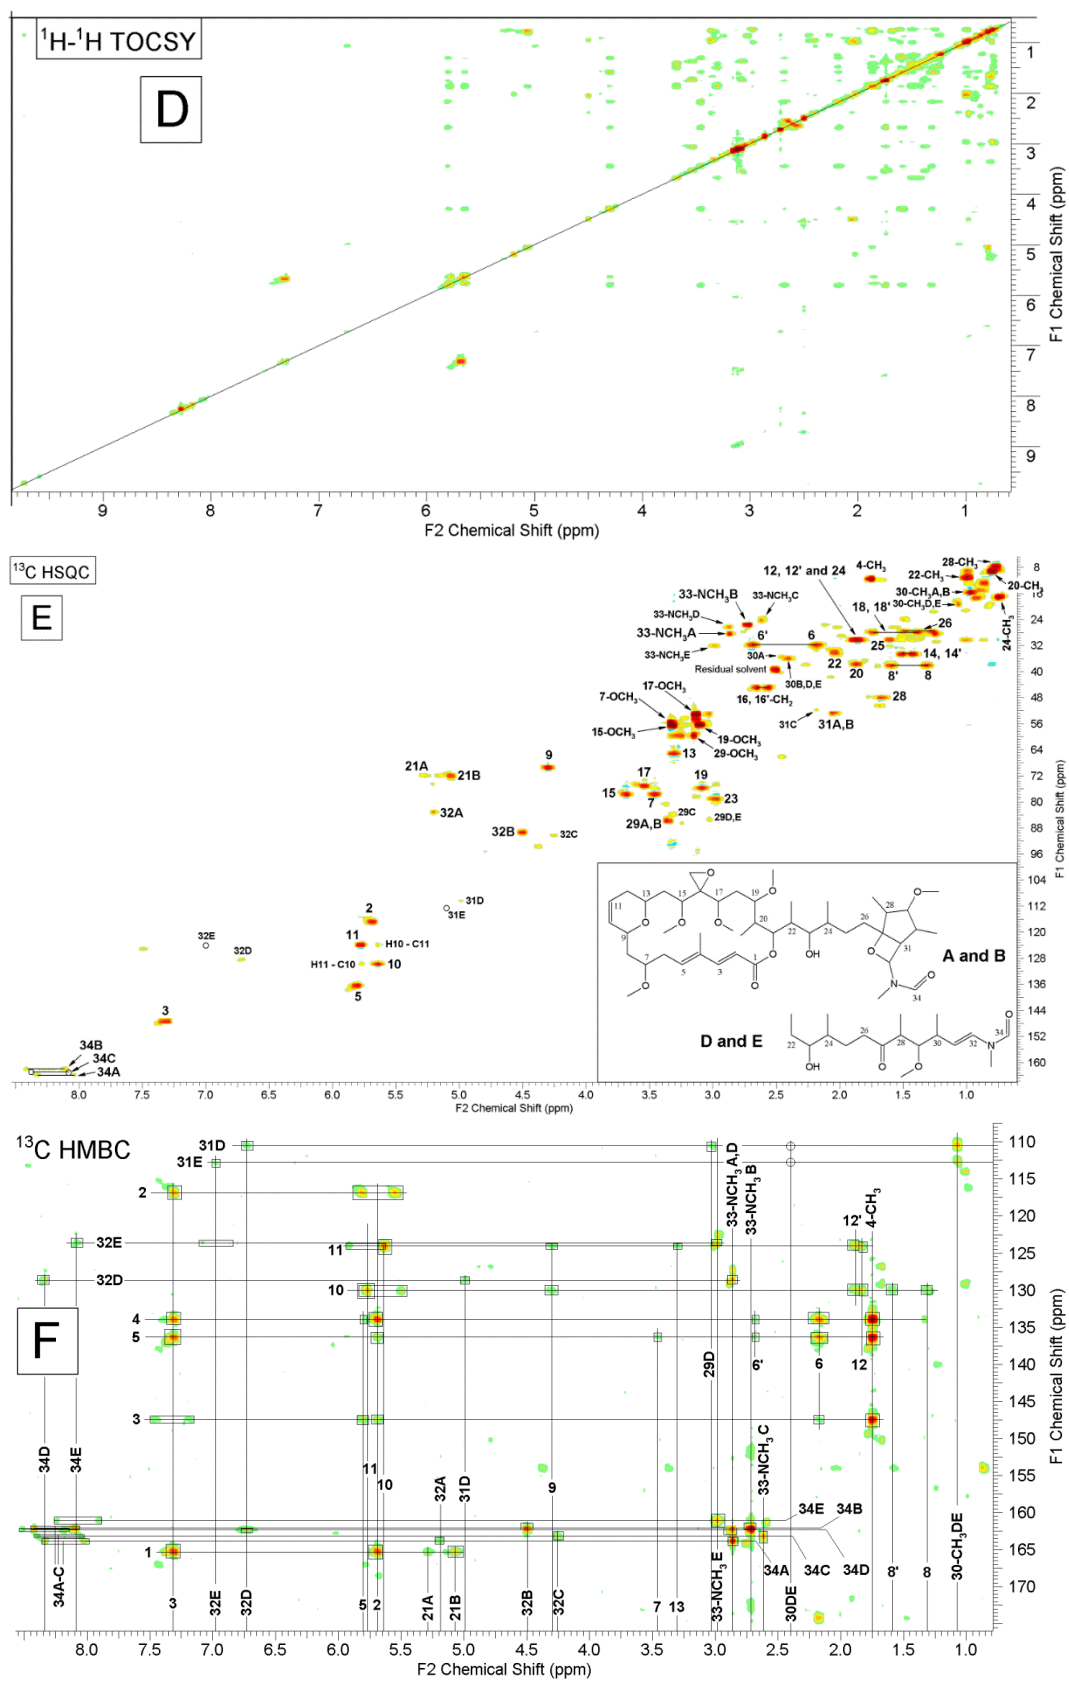

Figure S3. Cont.



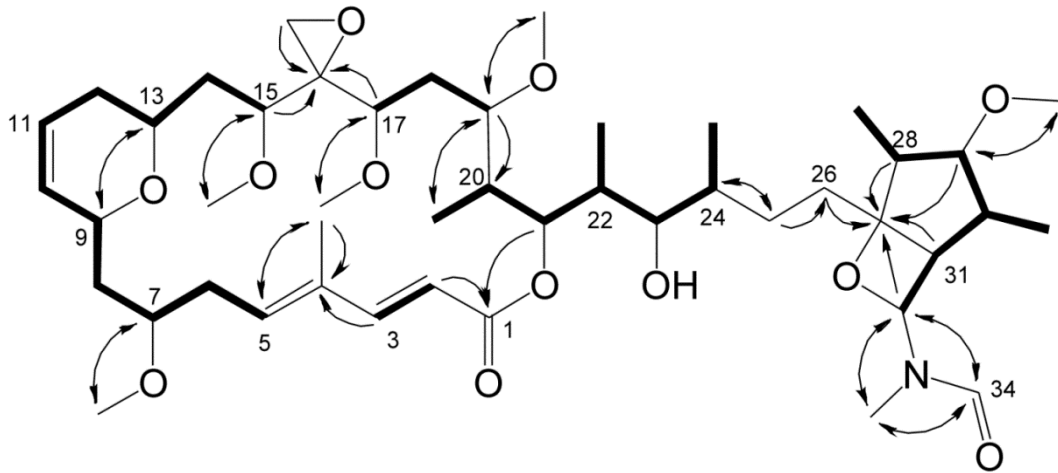

**Figure S4.** Structure of photoreacted 7-OMe-scytophycin B (2, Figure 1) with  $^1\text{H}$ - $^1\text{H}$  DQF-COSY (bold lines) and  $^{13}\text{C}$  HMBC (arrows) correlations.

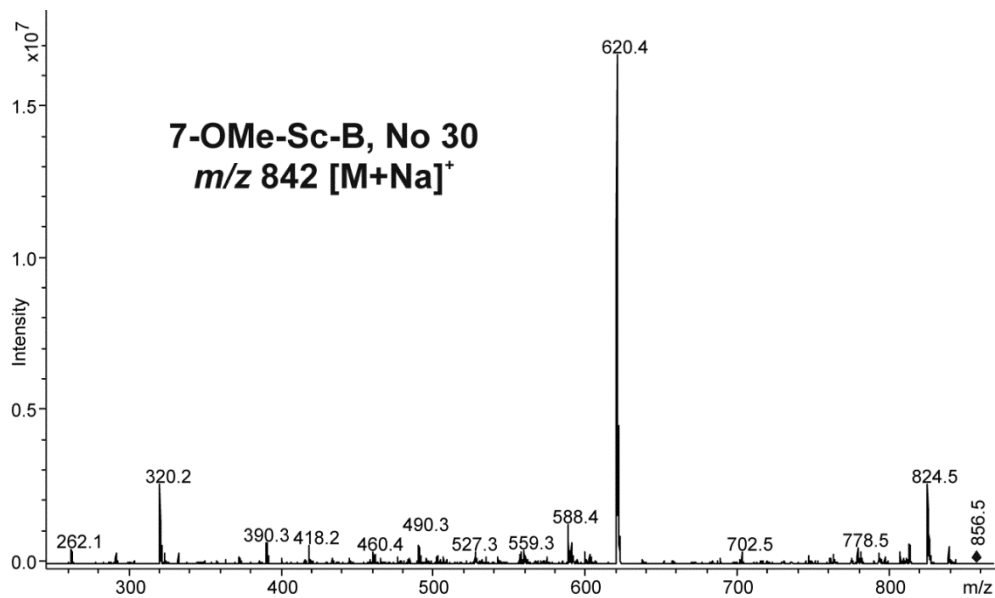

**Figure S5.** Product ion spectrum from sodiated 7-OMe-scytophycin-B ( $m/z$  856.5) produced by *Anabaena* sp. HAN21/1.

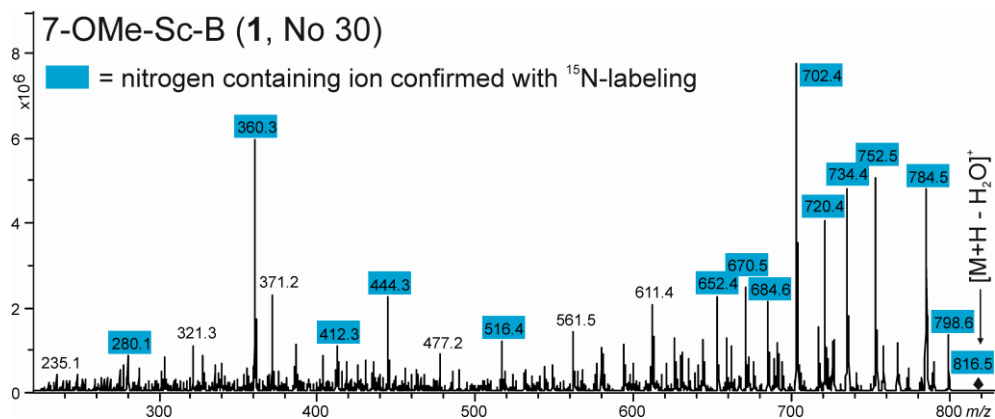

**Figure S6.** Product ion spectrum from dehydrated protonated 7-OMe-scytophycin-B from *Anabaena* sp. HAN21/1.

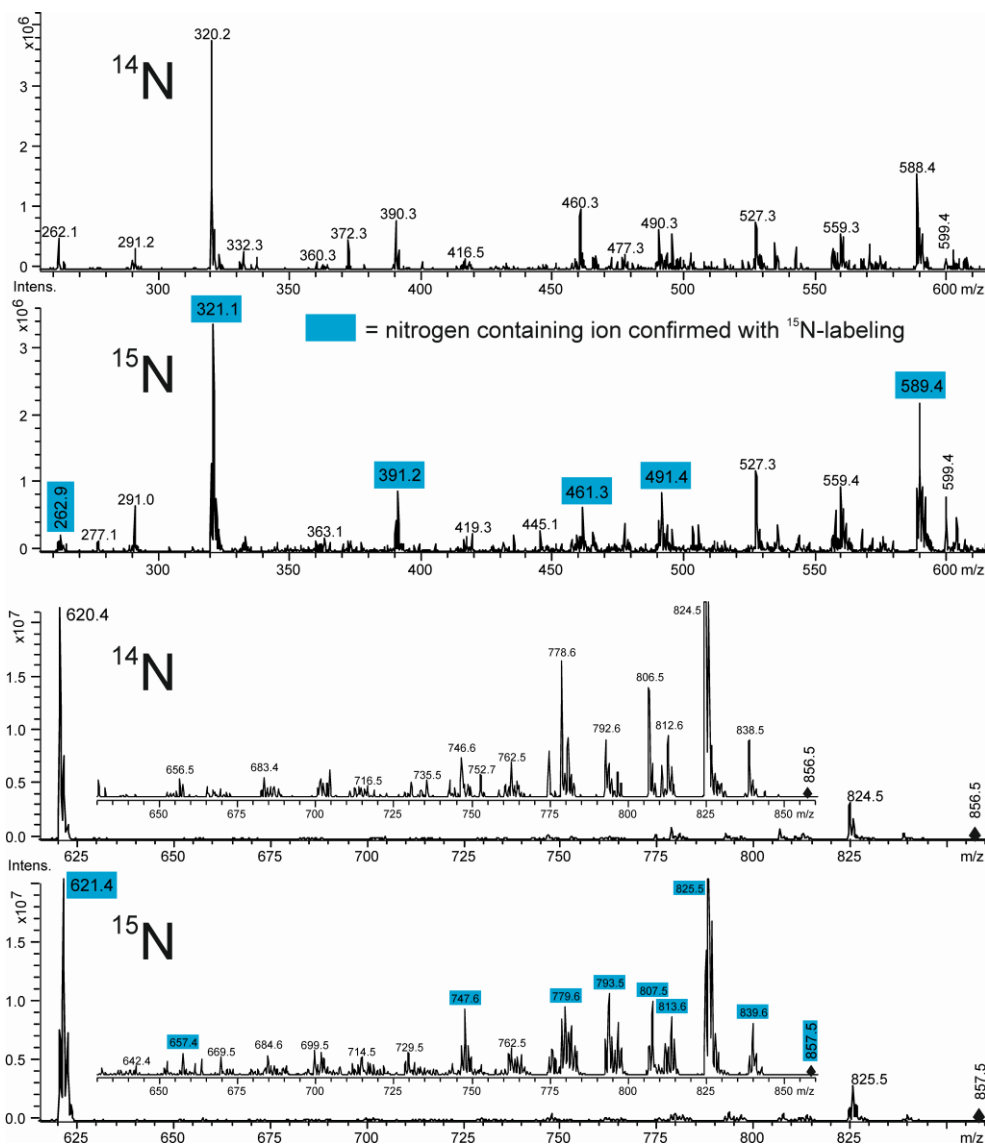

**Figure S7.** Nonlabeled ( $^{14}\text{N}$ ) and  $^{15}\text{N}$ -labeled product ion spectrum from sodiated 7-Ome-scytophycin-B (**1**, Figure 1 and No 30, Table 2) of *Anabaena* sp. HAN21/1.

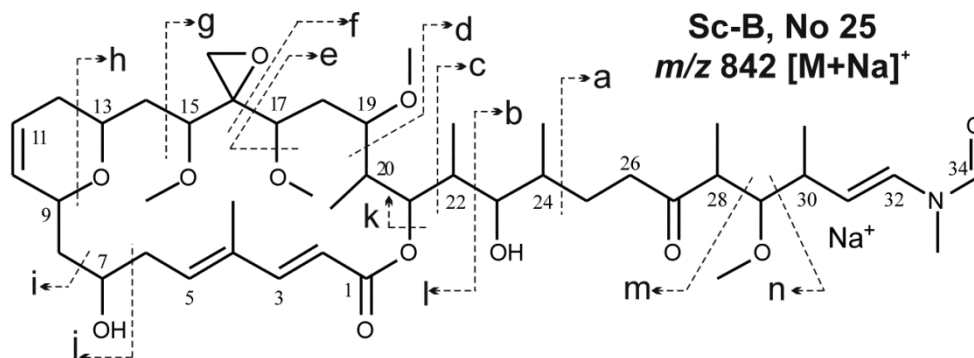

**Figure S8.** Structure of scytophycin-B (No 25 in Table 2 and Tables S2 and S4) showing the product ions (a, b, c, dk, ek, fk, gk, hk, ik, jk, lhk, l, m, hk, m and n) studied from the sodiated ion [M + Na]<sup>+</sup>.



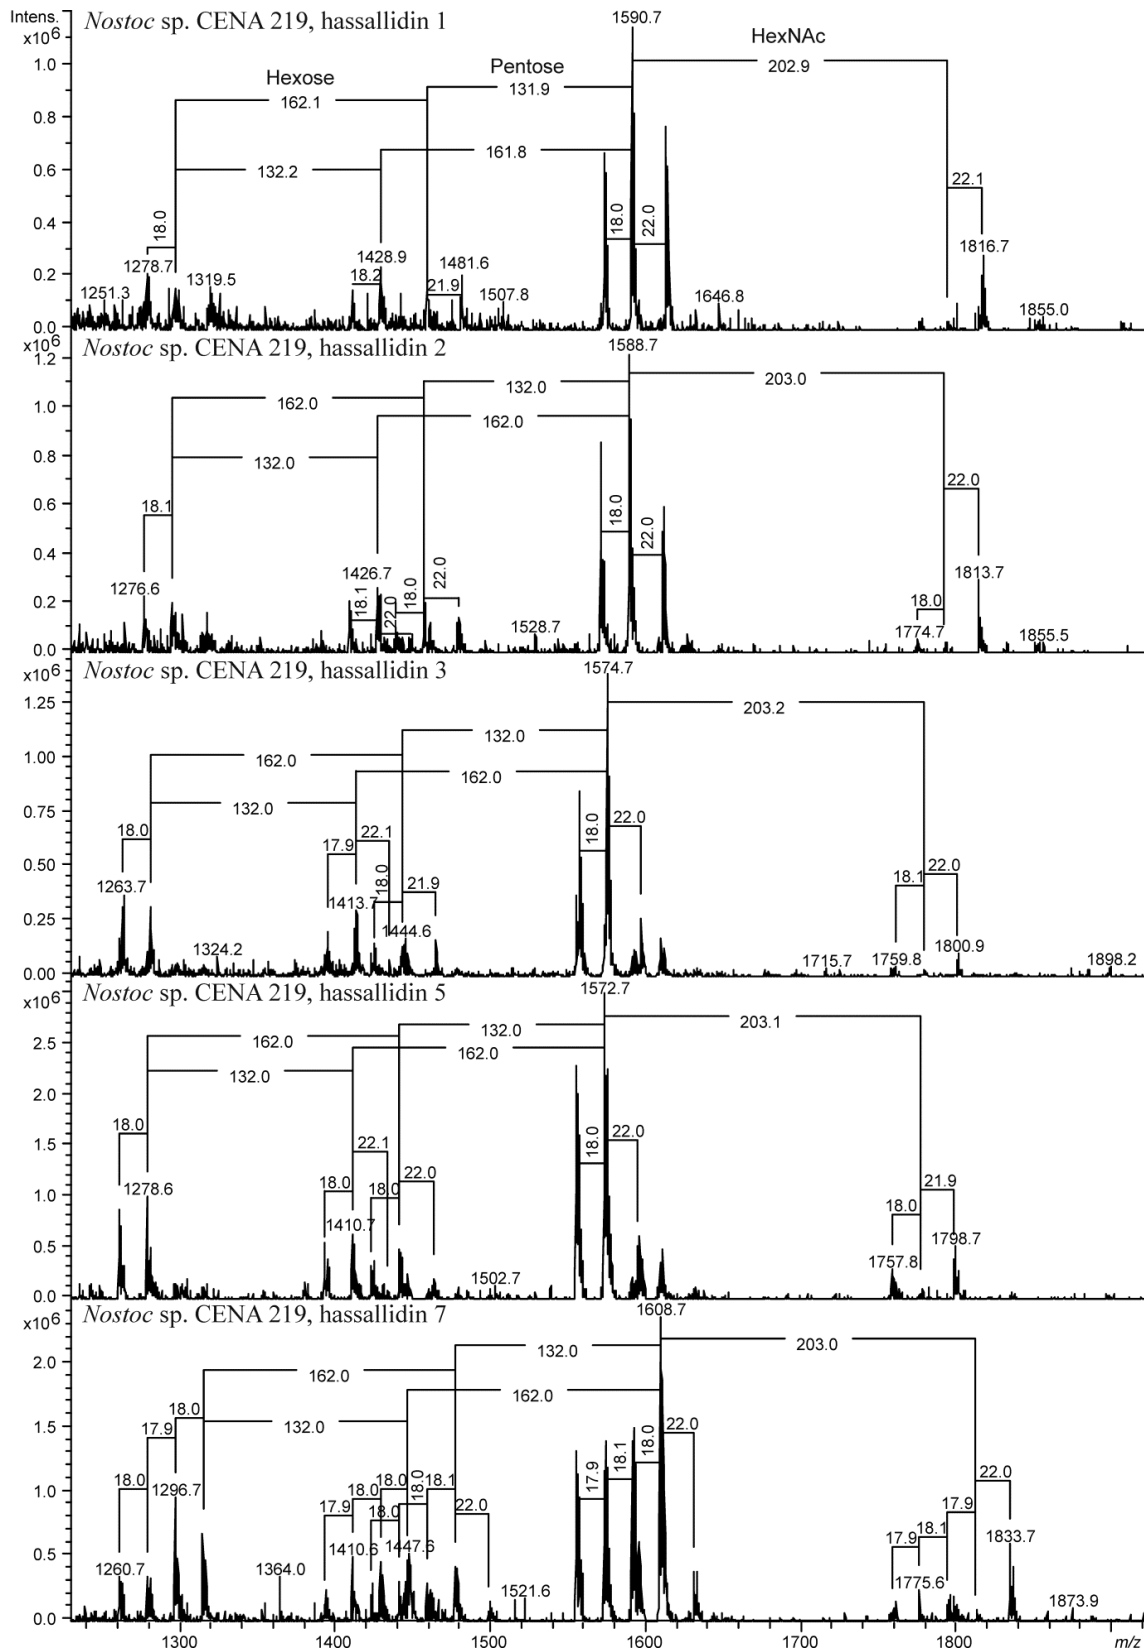

Figure S9. Mass spectra of *Nostoc* sp. CENA 219 hassallidins 1, 2, 3, 5 and 7.

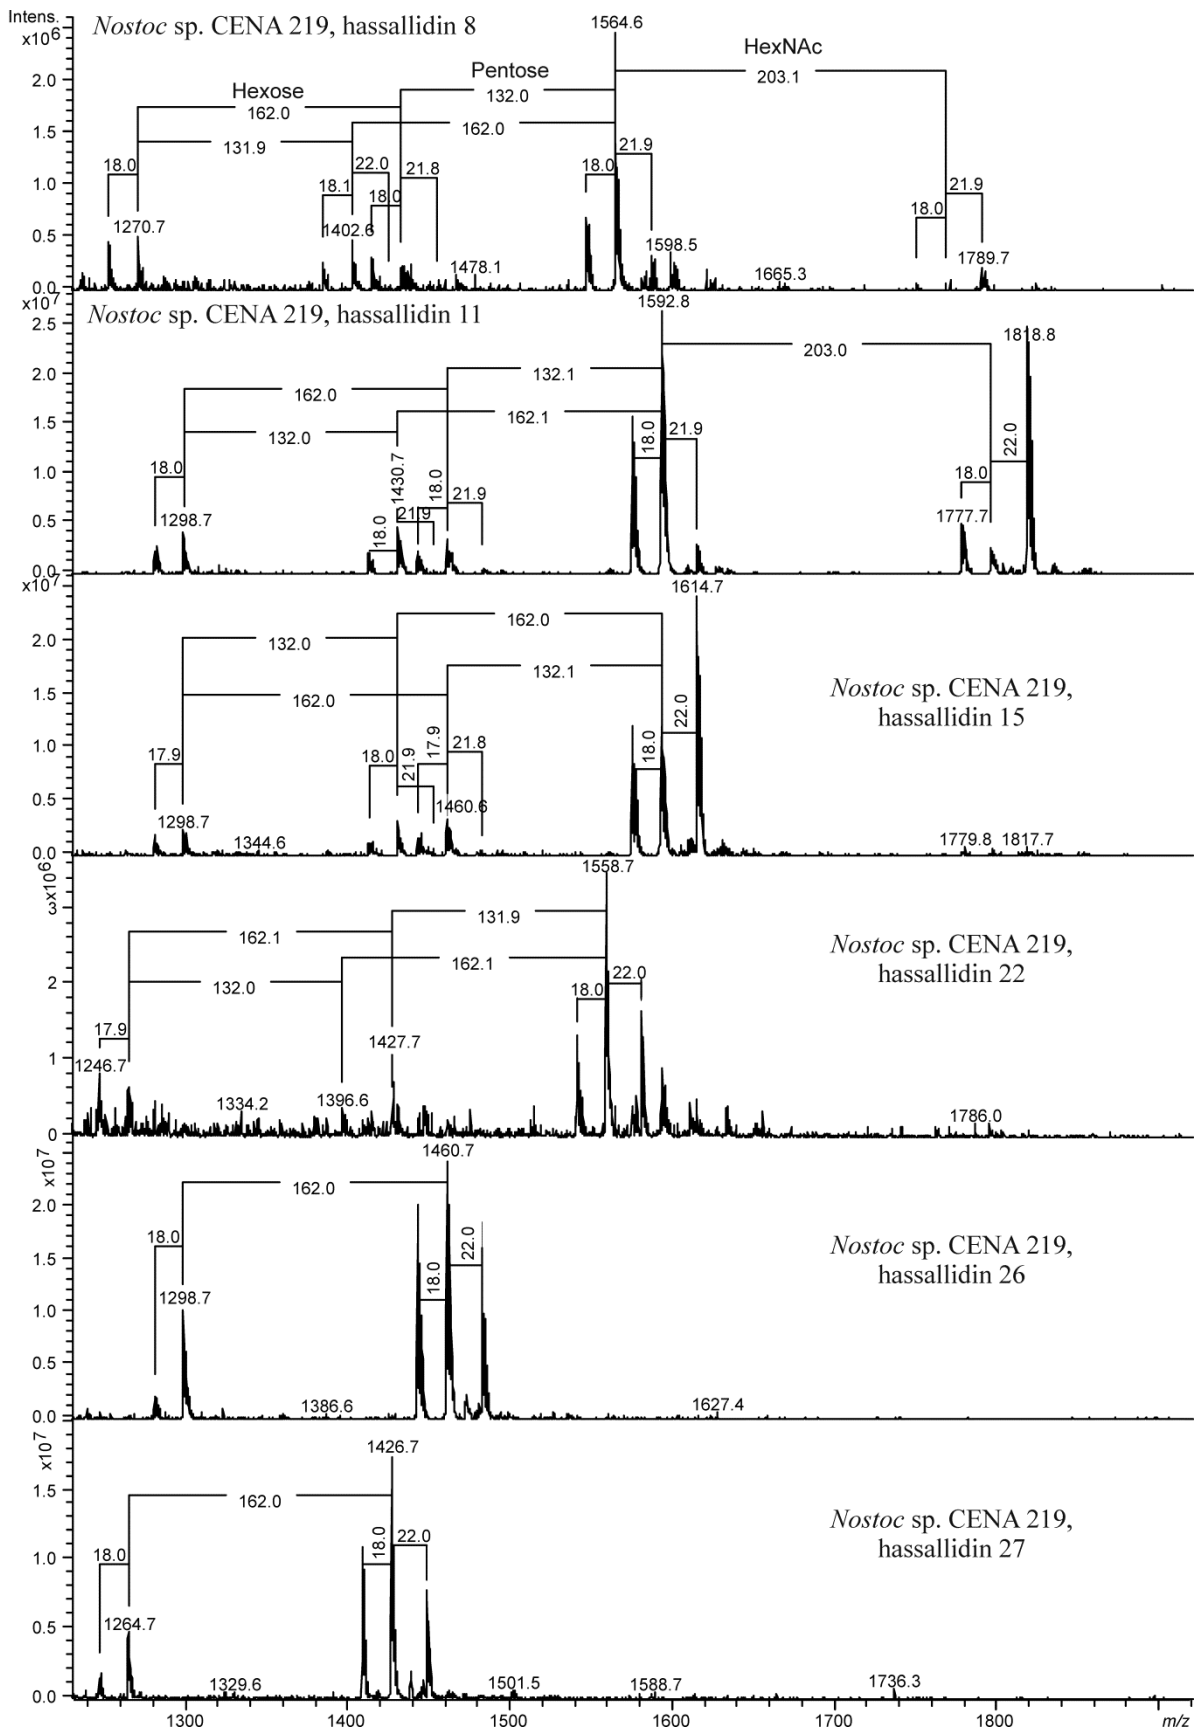

Figure S10. Mass spectra of *Nostoc* sp. CENA 219 hassallidins 8, 11, 15, 22, 26 and 27.

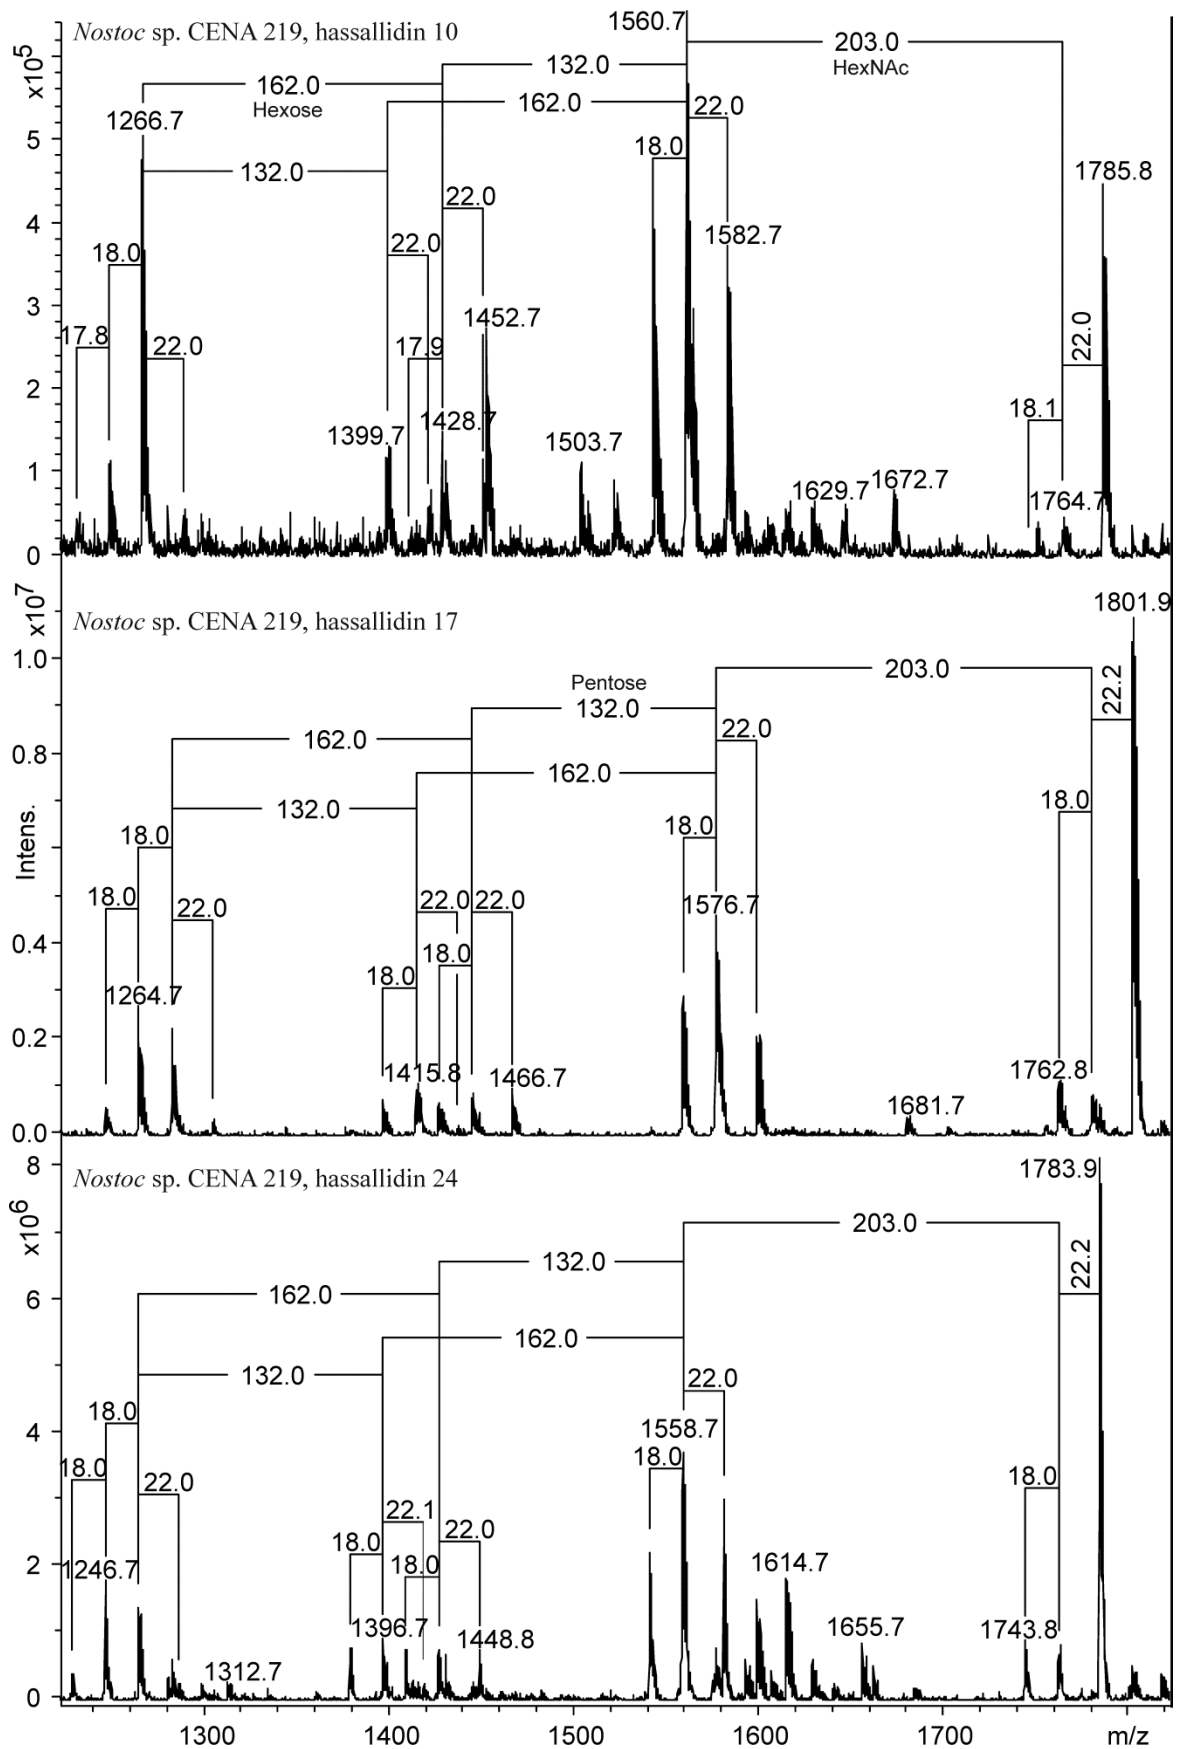

Figure S11. Mass spectra of *Nostoc* sp. CENA 219 hassallidins 10, 17 and 24.

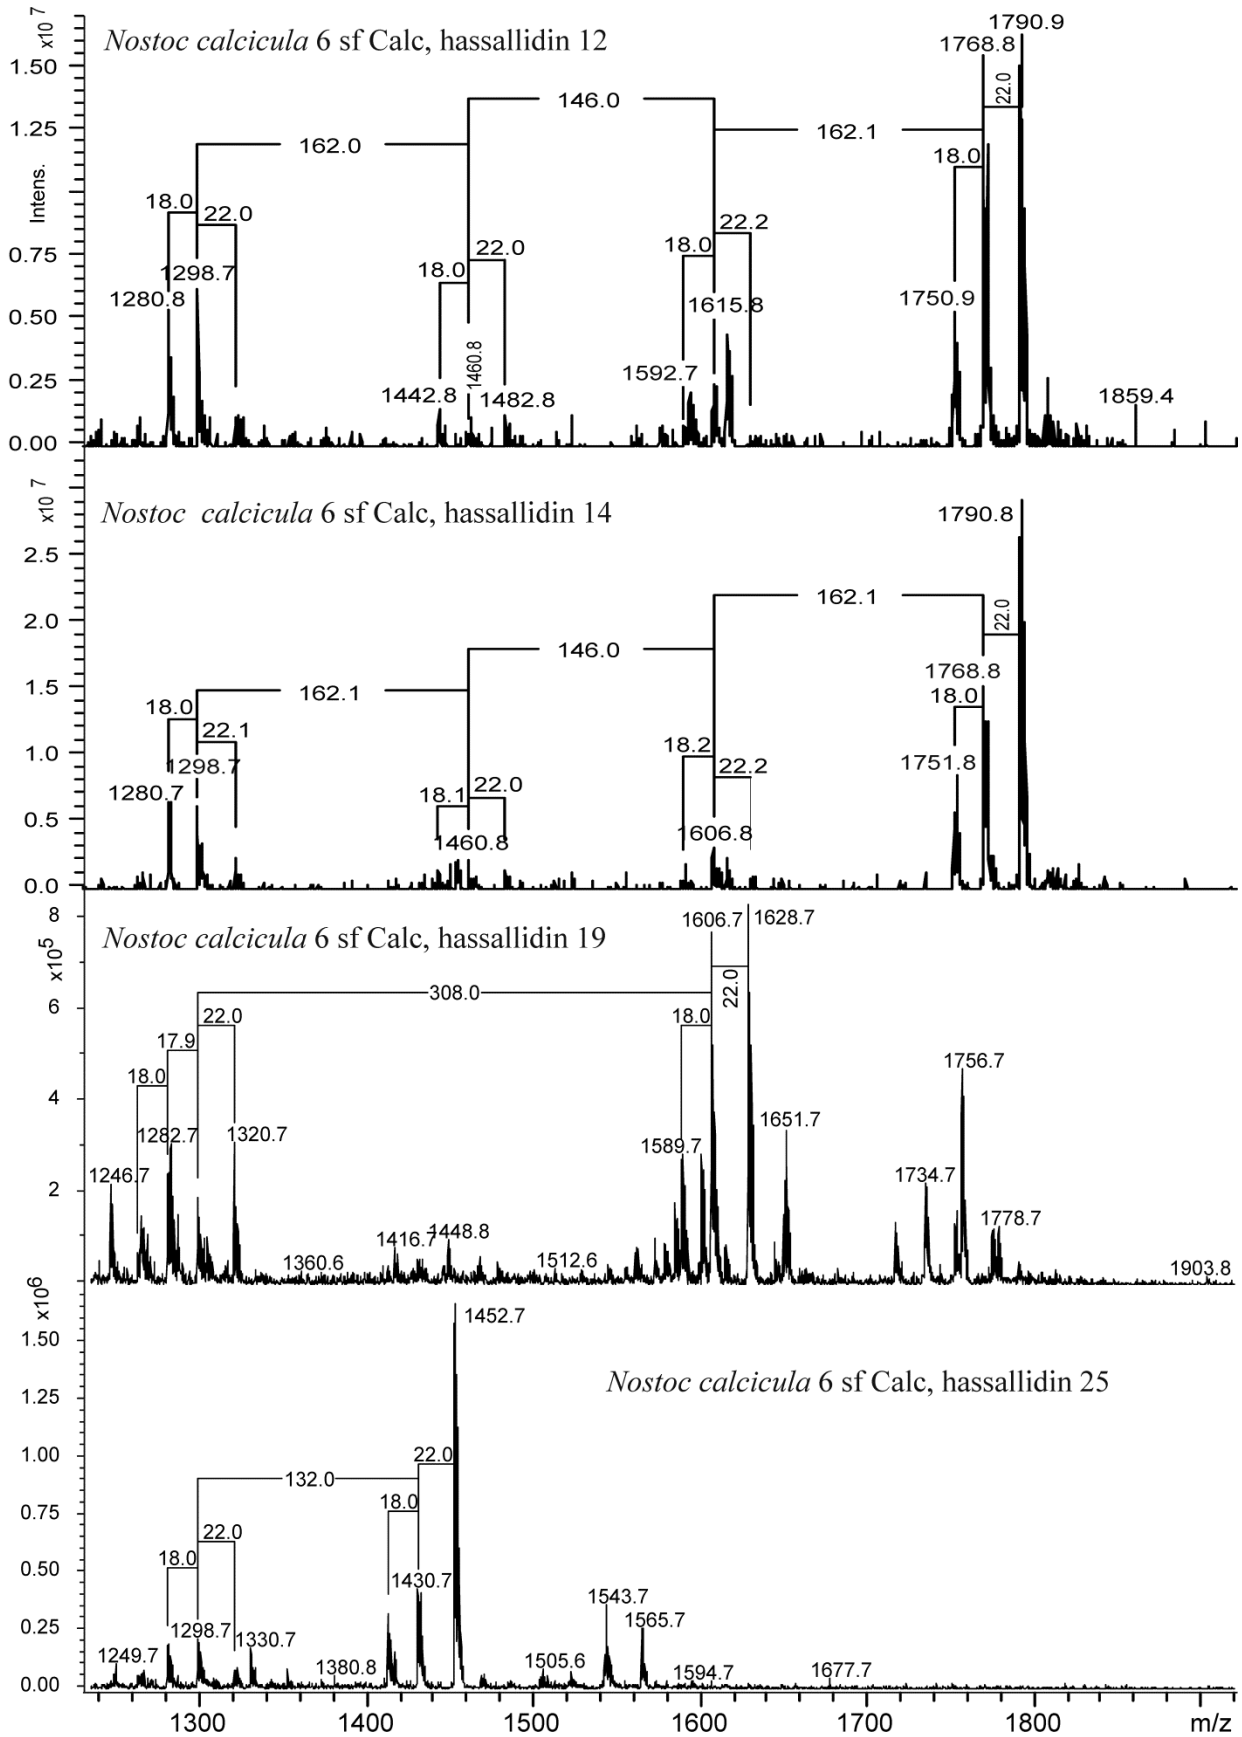

Figure S12. Mass spectra of *Nostoc* sp. 6 sf Calc hassallidins 12, 14, 19 and 25.

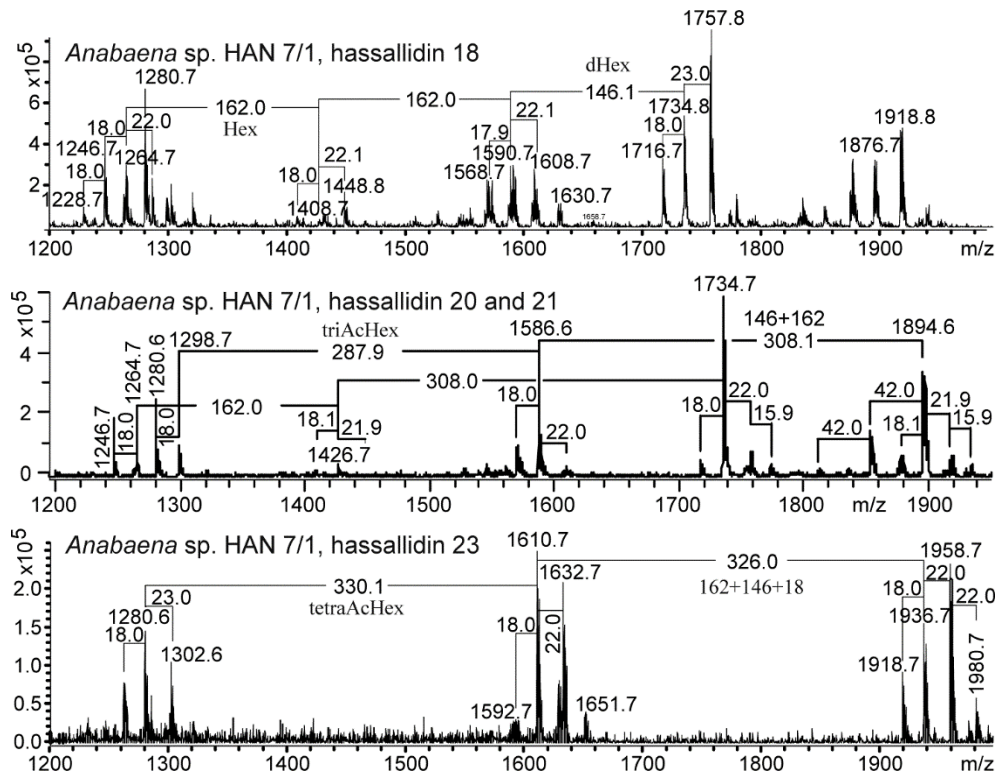

Figure S13. Mass spectra of *Anabaena* sp. HAN7/1 hassallidins 18, 20, 21 and 23.

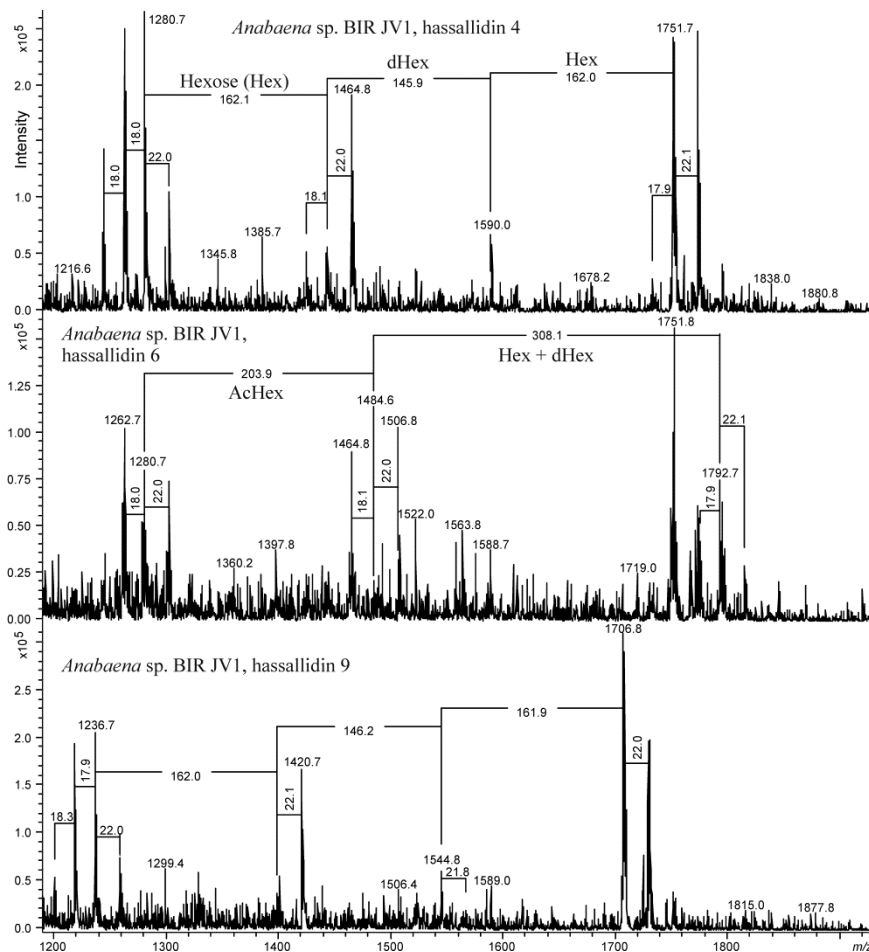

Figure S14. Mass spectra of *Anabaena cylindrica* BIR JV1 hassallidins 4, 6, and 9.

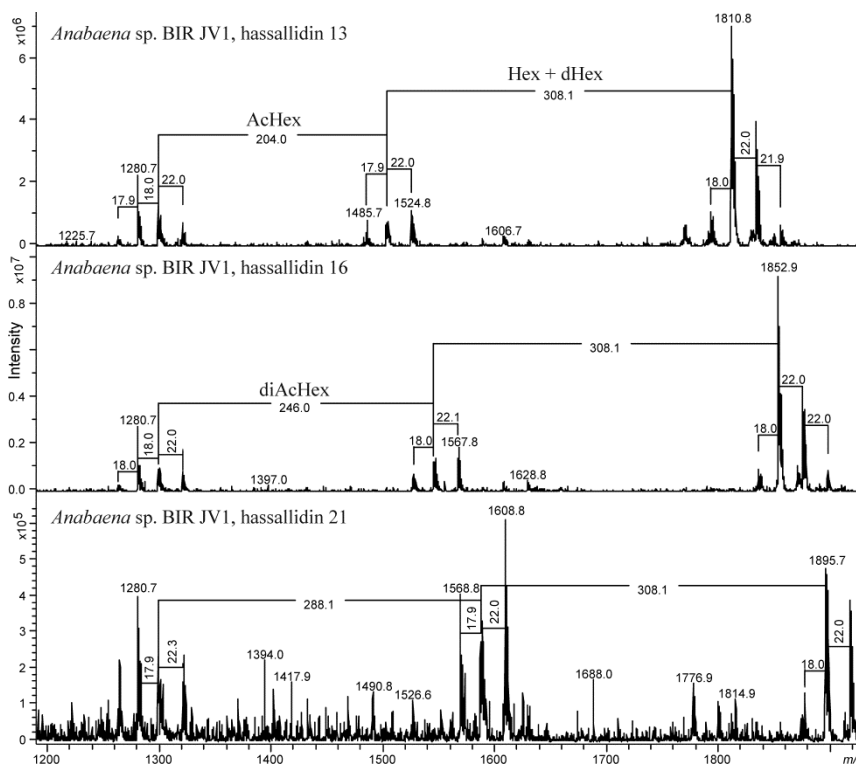

**Figure S15.** Mass spectra of *Anabaena cylindrica* BIR JV1 hassallidins 13, 16, and 21.

## References

1. Moore, R.E.; Patterson, G.M.L.; Mynderse, J.S.; Barchi Jr., J.; Norton, T.R.; Furusawa, E.; Furusawa, S. Toxins from cyanophytes belonging to the scytonemataceae. *Pure Appl. Chem.* **1986**, *58*, 263–271.
2. Ishibashi, M.; Moore, R.E.; Patterson, G.M.L. Scytophycins, Cytotoxic and antimycotic agents from the cyanophyte *Scytonema pseudohofmanni*. *J. Org. Chem.* **1986**, *51*, 5300–5306.
3. Carmeli, S.; Moore, R.E.; Patterson, G.M.L. Tolytoxin and new scytophycins from three species of *Scytonema*. *J. Nat. Prod.* **1990**, *53*, 1533–1542.
4. Nakao, Y.; Yoshida, W.Y.; Szabo, C.M.; Baker, B.J.; Scheuer, P.J. More Peptides and Other Diverse Constituents of the Marine Mollusk *Philineopsis speciosa*. *J. Org. Chem.* **1998**, *63*, 3272–3280.
5. Tomsickova, J.; Ondrej, M.; Cerny, J.; Hrouzek, P.; Kopecky, J. Analysis and detection of scytophycin variants by HPLC-ESI-MS. *Chem. Nat. Compd.* **2014**, *49*, 1170–1171.

© 2015 by the authors; licensee MDPI, Basel, Switzerland. This article is an open access article distributed under the terms and conditions of the Creative Commons Attribution license (<http://creativecommons.org/licenses/by/4.0/>).
